# Supplementary material for: Spatially resolved fluoroalkylation and alkylation of graphene by direct laser writing
Source: Royal Society of Chemistry journal article supplement (doi:10.1039/d3cc05355e), 2023-12-14
Supplement: d3cc05355e1.pdf [file d3cc05355e1.pdf]

## Supporting Information

### **Spatially Resolved Fluoroalkylation and Alkylation of Graphene by Direct Laser Writing**

*Sabrin Al-Fogra, Sofia Rohde, Marcus Speck, Fank Hauke, Andreas Hirsch and Tao Wei\**,

Department of Chemistry and Pharmacy & Center of Advance Materials and Processes (ZMP), Friedrich-Alexander University of Erlangen-Nürnberg, Nikolaus-Fiebiger-Strasse 10, 91058, Erlangen, Germany

E-mail: tao.wei@fau.de

## **Materials**

CVD graphene on a 1×1 cm<sup>2</sup> polymethyl methacrylate (PMMA) substrate was purchased from ACS Material Co. (USA). All other chemicals were purchased from Sigma Aldrich Co. (Germany) and used without further treatment. Si/SiO<sub>2</sub> wafers (300 nm oxide layer) were purchased from Fraunhofer-Institute in Erlangen. Before use, the Si/SiO<sub>2</sub> wafers were cleaned by immersing them in isopropanol for ultrasonic treatment (300 W) for 5 min.

## **Raman Spectroscopy**

The Raman spectroscopic characterization was performed on a Horiba Jobin Yvon LabRAM Aramis. A laser (Olympus LMPlanFI50x, NA 0.50) with an excitation wavelength of 532 nm, intensity of 8 mW, and a spot size of ~ 1 μm was used. The spectrometer was calibrated by using crystalline graphite. Spectral data was obtained through a motorized x-y table in a continuous line scan mode (SWIFT-module). The temperature-dependent Raman measurements were performed in a LinkAM stage THMS 600, equipped with a liquid nitrogen pump MS94 for temperature stabilization under a constant flow of nitrogen. The measurements were carried out on Si/SiO<sub>2</sub> wafers with a heating rate of 10 °C/min.

The Statistical Raman mappings were carried out on a confocal Raman microscope (WITec, alpha 300RA) using the green laser with an excitation wavelength of 532 nm, integration time of 1s, and the intensity of 2 mW.

## Experimental Section

All chemicals used were of analytical grade and purchased from Aldrich Co. The solvents were purified before use by distillation. Analytical thin-layer chromatography (TLC) was performed on Merck silica gel (neutral, fluorescence indicator F254) precoated plates.  $^1\text{H}$  NMR spectra were recorded at frequencies of 600 MHz (Bruker Ascend 600, probe head CPDCH600S3 C/H-D-05Z), carbon-13 spectra at 151 MHz. The NMR spectra of the fluorinated compounds were recorded at Bruker Ascend 500, probe head PATBO500S1BB-H/F-D-05ZFB, with frequencies of 471 MHz ( $^{19}\text{F}$ ) and 126 MHz ( $^{13}\text{C}$ ). All chemical shifts of  $^1\text{H}$  and  $^{13}\text{C}$  are given in ppm and have been converted to the  $\delta$  scale and are referenced against the DMSO signal as an internal standard. The  $^{19}\text{F}$  shifts are referenced against an externally measured  $\text{C}_6\text{F}_6$  probe,  $\delta = -164.9$  ppm.

### Synthesis of silver(I) perfluorocarboxylates

According to known procedures [1-3], silver(I) carbonate (7.4 mMol - 21.3 mMol) reacted with the equimolar amount of perfluorinated carboxylic acids (7.4 mMol - 21.3 mMol) under room temperature and in the absence of light in an aqueous ethanolic solution within 24 hours. After filtration, the precipitate was washed with ethanol and dried. ( $\text{G}_{\text{F1}}$  -  $\text{G}_{\text{F8}}$ ).

Silver(I) perfluoropropanoate,  $\text{C}_3\text{F}_5\text{-COOAg}$  [509-09-1] ( $\text{G}_{\text{F1}}$ )

Yield 4.78 g (80 %),  $\delta_{\text{C}}$  (126 MHz,  $\text{DMSO-}d_6$ ) 107.26, 119.13, 158.81 ppm;  $\delta_{\text{F}}$  (471 MHz,  $\text{DMSO-}d_6$ ) -84.06 (3F), -120.40 (2F) ppm.

Silver(I) perfluorobutanoate,  $\text{C}_3\text{F}_7\text{-COOAg}$  [3794-64-7] ( $\text{G}_{\text{F2}}$ )

Yield 5.61 g (98 %),  $\delta_{\text{C}}$  (126 MHz,  $\text{DMSO-}d_6$ ) 108.78, 108.91, 117.81, 158.43 ppm;  $\delta_{\text{F}}$  (471 MHz,  $\text{DMSO-}d_6$ ) -82.46 (3F), -117.87 (2F), -128.52 (2F) ppm.

Silver(I) perfluoropentanoate,  $\text{C}_4\text{F}_9\text{-COOAg}$  [2795-30-4] ( $\text{G}_{\text{F3}}$ )

Yield 4.65 g (94 %),  $\delta_{\text{C}}$  (126 MHz,  $\text{DMSO-}d_6$ ) 108.47, 109.22, 110.57, 117.21, 158.52 ppm;  $\delta_{\text{F}}$  (471 MHz,  $\text{DMSO-}d_6$ ) -82.92 (3F), -117.27 (2F), -125.01 (2F), -127.79 (2F) ppm.

Silver(I) perfluorohexanoate,  $\text{C}_5\text{F}_{11}\text{-COOAg}$  [336-02-7] ( $\text{G}_{\text{F4}}$ )

Yield 4.62 g (98 %),  $\delta_C$  (126 MHz, DMSO- $d_6$ ) 108.13, 109.28, 110.21, 111.04, 116.90, 158.33 ppm;  $\delta_F$  (471 MHz, DMSO- $d_6$ ) -82.70 (3F), -117.09 (2F), -124.39 (2F), -124.60 (2F), -127.29 (2F) ppm.

Silver(I) perfluoroheptanoate, C<sub>6</sub>F<sub>13</sub>-COOAg [424-05-5] (G<sub>F5</sub>)

Yield 4.26 g (94 %),  $\delta_C$  (126 MHz, DMSO- $d_6$ ) 108.00, 109.31, 109.03, 110.68, 111.13, 116.73, 158.35 ppm;  $\delta_F$  (471 MHz, DMSO- $d_6$ ) -82.68 (3F), -117.07 (2F), -123.86 (2F), -124.20 (2F), -125.03 (2F), -128.17 (2F) ppm.

Silver(I) perfluorooctanoate, C<sub>7</sub>F<sub>15</sub>-COOAg [335-93-3] (G<sub>F6</sub>)

Yield 4.07 g (92 %),  $\delta_C$  (126 MHz, DMSO- $d_6$ ) 107.89, 109.32, 109.81, 110.38, 110.74, 111.14, 116.62, 158.34 ppm;  $\delta_F$  (471 MHz, DMSO- $d_6$ ) -82.67 (3F), -117.08 (2F), -123.70 (2F), -124.23 (b, 2 x 2F), -124.93 (2F), -128.18 (2F) ppm.

Silver(I) perfluorononanoate, C<sub>8</sub>F<sub>17</sub>-COOAg [7358-16-9] (G<sub>F7</sub>)

Yield 3.38 g (78 %),  $\delta_C$  (126 MHz, DMSO- $d_6$ ) 107.86, 109.32, 109.72, 110.29, 110.46, 110.78, 111.17, 116.58, 158.32 ppm;  $\delta_F$  (471 MHz, DMSO- $d_6$ ) -82.67 (3F), -117.09 (2F), -123.68 (2F), -124.16 (b, 3x2F), -124.91 (2F), -128.17 (2F) ppm.

Silver(I) perfluorodecanoate, C<sub>9</sub>F<sub>19</sub>-COOAg [5784-82-7] (G<sub>F8</sub>)

Yield 2.58 g (47 %),  $\delta_C$  (126 MHz, DMSO- $d_6$ ) 107.82, 109.34, 109.67, 110.18, 110.33, 110.47, 110.78, 111.14, 116.54, 158.43 ppm;  $\delta_F$  (471 MHz, DMSO- $d_6$ ) -82.96 (3F), -117.20 (2F), -123.81 (2F), -124.27 (b, 4x2F), -125.06 (2F), -128.38 (2F) ppm.

#### Synthesis of silver(I) carboxylates

According to known procedure <sup>[4,5]</sup>, carboxylic acid (26.0 mMol – 48.3 mMol) was dissolved in the absence of light in the equimolar amount of 1M aqueous KOH (26.0 – 48.3 mMol), followed by the addition of an equimolar amount of 1M aqueous AgNO<sub>3</sub> solution. After 24 h stirring and subsequent filtration under vacuum, the precipitate was washed with ice cold water (55 mL – 90 mL) and dried. (G<sub>H1</sub> – G<sub>H6</sub>).

Silver(I) propanoate, C<sub>2</sub>H<sub>5</sub>-COOAg [5489-14-5] (G<sub>H1</sub>)

Yield 5.67 g (65 %),  $\delta_H$  (600 MHz, DMSO- $d_6$ ) 0.99 (t, *J* 7.6 Hz, 3H, CH<sub>3</sub>), 2.09 (q, *J* 7.6, 2H, CH<sub>2</sub>) ppm;  $\delta_C$  (151 MHz, DMSO- $d_6$ ) 11.29, 29.63, 177.72 ppm.

Silver(I) butanoate, C<sub>3</sub>H<sub>7</sub>-COOAg [5076-24-4] (G<sub>H2</sub>)

Yield 7.00 g (79 %),  $\delta_{\text{H}}$  (600 MHz, DMSO-*d*<sub>6</sub>) 0.86 (t, *J* 7.4 Hz, 3H, CH<sub>3</sub>), 1.51 (tq (*pseudo*-hext), *J* 7.4 Hz, 2H, CH<sub>2</sub>-CH<sub>3</sub>), 2.08 (t, *J* 7.3, 2H, OOC-CH<sub>2</sub>) ppm;  $\delta_{\text{C}}$  (151 MHz, DMSO-*d*<sub>6</sub>) 14.19, 19.71, 38.75, 176.96 ppm.

Silver(I) pentanoate, C<sub>4</sub>H<sub>9</sub>-COOAg [35363-46-3] (G<sub>H3</sub>)

Yield 6.50 g (81 %),  $\delta_{\text{H}}$  (600 MHz, DMSO-*d*<sub>6</sub>) 0.85 (t, *J* 7.4 Hz, 3H, CH<sub>3</sub>), 1.27 (m, 2H, CH<sub>2</sub>), 1.47 (m, 2H, CH<sub>2</sub>), 2.09 (t, *J* 7.4, 2H, OOC-CH<sub>2</sub>) ppm;  $\delta_{\text{C}}$  (151 MHz, DMSO-*d*<sub>6</sub>) 13.88, 22.21, 28.67, 36.36, 177.10 ppm.

Silver(I) hexanoate, C<sub>5</sub>H<sub>11</sub>-COOAg [32461-90-8] (G<sub>H4</sub>)

Yield 5.50 g (77 %),  $\delta_{\text{H}}$  (600 MHz, DMSO-*d*<sub>6</sub>) 0.85 (t, *J* 7.1 Hz, 3H, CH<sub>3</sub>), 1.25 (m, 4H, 2xCH<sub>2</sub>), 1.49 (m, 2H, CH<sub>2</sub>), 2.07 (t, *J* 7.4, 2H, OOC-CH<sub>2</sub>) ppm;  $\delta_{\text{C}}$  (151 MHz, DMSO-*d*<sub>6</sub>) 13.95, 22.04, 26.18, 31.42, 36.61, 177.10 ppm.

Silver(I) heptanoate, C<sub>6</sub>H<sub>13</sub>-COOAg [32461-91-9] (G<sub>H5</sub>)

Yield 5.46 g (73 %),  $\delta_{\text{H}}$  (600 MHz, DMSO-*d*<sub>6</sub>) 0.84 (t, *J* 7.0 Hz, 3H, CH<sub>3</sub>), 1.24 (m, 6H, 3xCH<sub>2</sub>), 1.47 (m, 2H, CH<sub>2</sub>), 2.07 (t, *J* 7.4, 2H, OOC-CH<sub>2</sub>) ppm;  $\delta_{\text{C}}$  (151 MHz, DMSO-*d*<sub>6</sub>) 13.96, 22.08, 26.24, 28.78, 31.21, 36.29, 177.78 ppm.

Silver(I) octanoate, C<sub>7</sub>H<sub>15</sub>-COOAg [24927-67-1] (G<sub>H6</sub>)

Yield 6.49 g (91 %),  $\delta_{\text{H}}$  (600 MHz, DMSO-*d*<sub>6</sub>) 0.86 (t, *J* 7.0 Hz, 3H, CH<sub>3</sub>), 1.26 (m, 8H, 4xCH<sub>2</sub>), 1.49 (m, 2H, CH<sub>2</sub>), 2.05 (t, *J* 7.4, 2H, OOC-CH<sub>2</sub>) ppm;  $\delta_{\text{C}}$  (151 MHz, DMSO-*d*<sub>6</sub>) 13.67, 21.83, 26.24, 28.39, 28.94, 31.06, 36.28, 176.83 ppm.

**2D-patterning of graphene via laser-writing.** The Si/SiO<sub>2</sub> wafer was first cleaned by immersing it in isopropanol, followed by ultrasonic treatment (300 W) for 5 min. Then, a graphene monolayer was deposited to this wafer by a wet transfer technique. Here, the PMMA-supported graphene, floating on top of a water surface, was fished onto the prepared Si/SiO<sub>2</sub> wafer. The PMMA layer was easily removed by dissolution with acetone overnight. Afterward, the wafers were immersed in a solution of respective reagents (9 mmol/mL, see below for details) dissolved in isopropanol for 30 min. Subsequently, a drop of the solution was applied onto the wafer, respectively, resulting

in the generation of a thin and homogeneous crystalline film atop the graphene by evaporating the solvent with argon. The laser writing procedure was carried out using a green laser ( $\lambda_{exc} = 532 \text{ nm}$ , 50x objective magnification, irradiation time 1s, 8mW) for the photolysis of the reactants. This process generates highly reactive fluoroalkylated and alkylated radicals that selectively bound to the underlying graphene exclusively in the laser-irradiated areas (Figure S1 and S2). Finally, washing away the excess reagents with isopropanol gives rise to the target-pattered graphene architectures. The employed photoactive compounds are: (I) fluoroalkyl silver carboxylates, including  $C_3AgF_5O_2$ ,  $C_4AgF_7O_2$ ,  $C_5AgF_9O_2$ ,  $C_6AgF_{11}O_2$ ,  $C_7AgF_{13}O_2$ ,  $C_8AgF_{15}O_2$ ,  $C_8AgF_{15}O_2$ , and  $C_8AgF_{15}O_2$ , and (II) alkyl silver carboxylates containing  $C_3H_5AgO_2$ ,  $C_4H_7AgO_2$ ,  $C_5H_9AgO_2$ ,  $C_6H_{11}AgO_2$ ,  $C_7H_{13}AgO_2$ , and  $C_8H_{15}AgO_2$ .

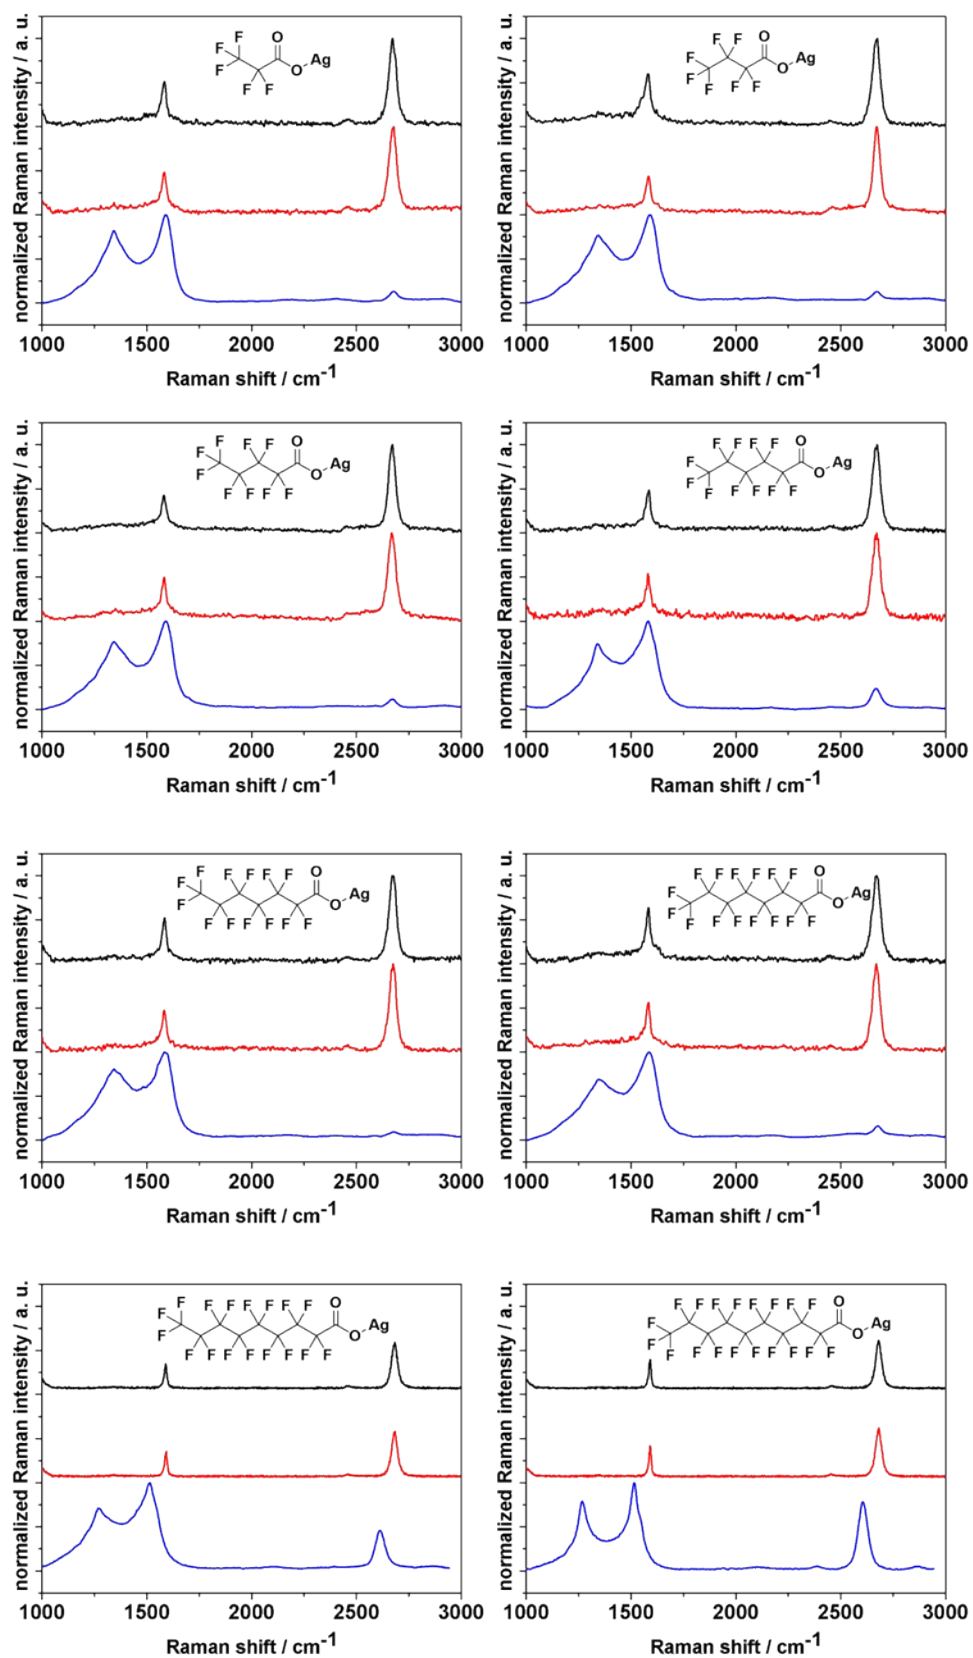

**Figure S1.** Normalized mean Raman spectra of pristine graphene (black line), non-irradiated areas (red line), and irradiated areas of samples  $G_{F1}$ - $G_{F8}$  (blue line).

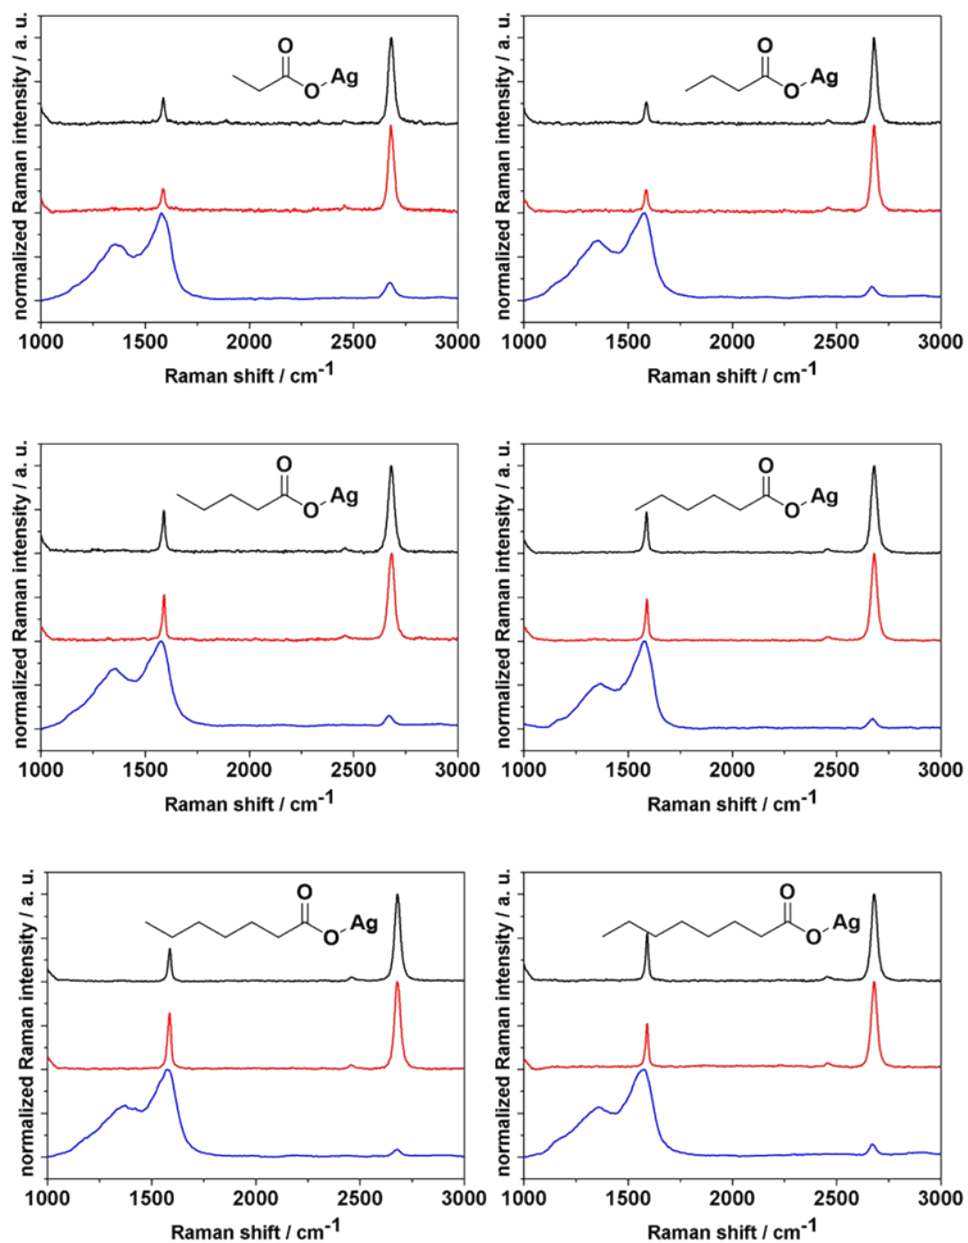

**Figure S2.** Normalized mean Raman spectra of pristine graphene (black line), non-irradiated areas (red line), and irradiated areas of samples **G<sub>H1</sub>**-**G<sub>H6</sub>** (blue line).



**Temperature-Dependent Raman analysis.** Temperature-dependent Raman spectroscopy measurements were conducted to investigate the thermal stability of the addend binding in the fluoroalkylated graphene (Figure S3) and alkylated graphene (Figure S4). The temperature-dependent Raman measurements were performed in a Linkam state, equipped with a liquid nitrogen pump for temperature stabilization under a constant flow of nitrogen to determine the thermal stability and the reversibility of the covalent addend binding. The measurements were carried out on Si/SiO<sub>2</sub> wafers with a heating rate of 10 °C/min and the developments of the Raman-specific bands were recorded. For samples **G<sub>F1</sub>-G<sub>F8</sub>**, as the temperature rises to 350°C, the  $I_D/I_G$  ratio shows a continuous increase, reaching a value of approximate 1.0 (Figure S3). Overall, the behavior of all samples is very similar, with a maximum  $I_D/I_G$  ratio of 0.95 - 1.0. However, a further increase in the temperature to 400°C leads to a sharp decline of the D band, resulting in an  $I_D/I_G$  ratio < 0.1, indicative of complete defunctionalization. As such, the intact sp<sup>2</sup>-carbon lattice of graphene is restored. Samples **G<sub>H1</sub>-G<sub>H6</sub>** exhibit a similar trend in D-peak behavior during heat treatments below 350 °C, where the intensity of the D-peak continuously increases with rising temperature until the  $I_D/I_G$  ratio reaches 0.9 (Figure S4). A further increase of the temperature to 400 °C results in the complete disappearance of the D-, G-, and 2D-band. This suggests that, unlike **G<sub>H1</sub>-G<sub>H6</sub>**, the high-temperature processing leads to the disintegration of the graphene network rather than the cleavage of the bond between graphene and addends.

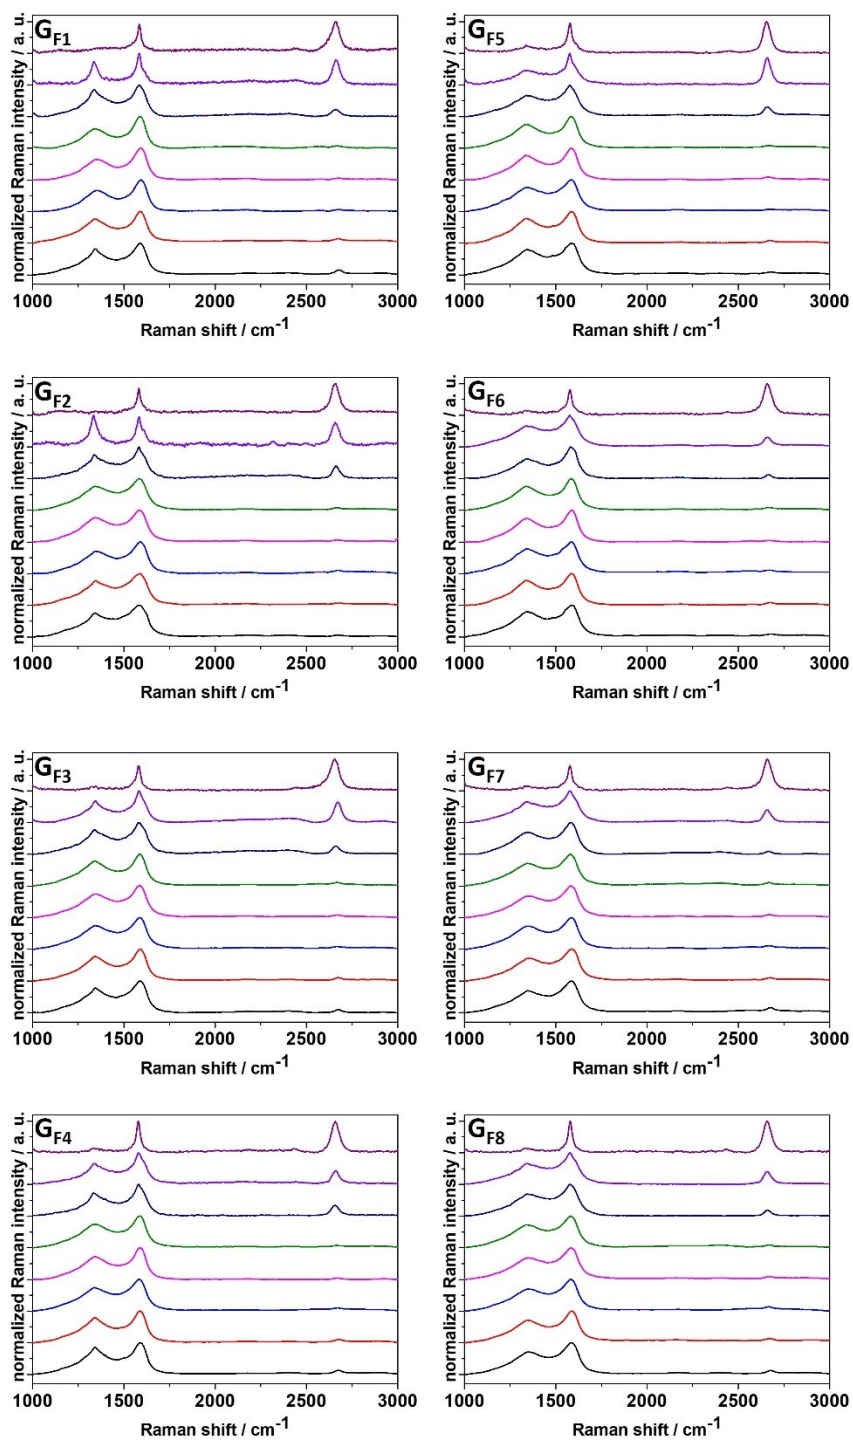

**Figure S3.** Temperature-dependent Raman spectra of samples  $G_{F1}$ - $G_{F8}$ .

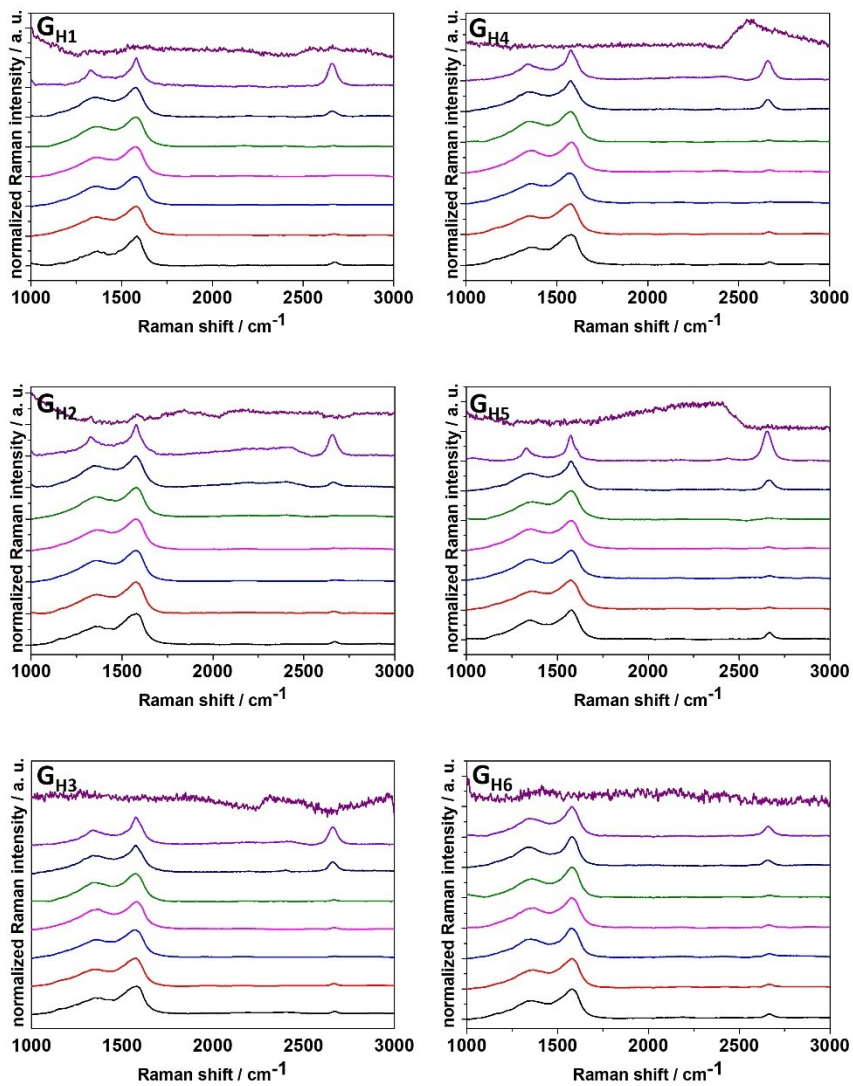

**Figure S4.** Temperature-dependent Raman spectra of samples  $G_{H1}$ - $G_{H6}$ .

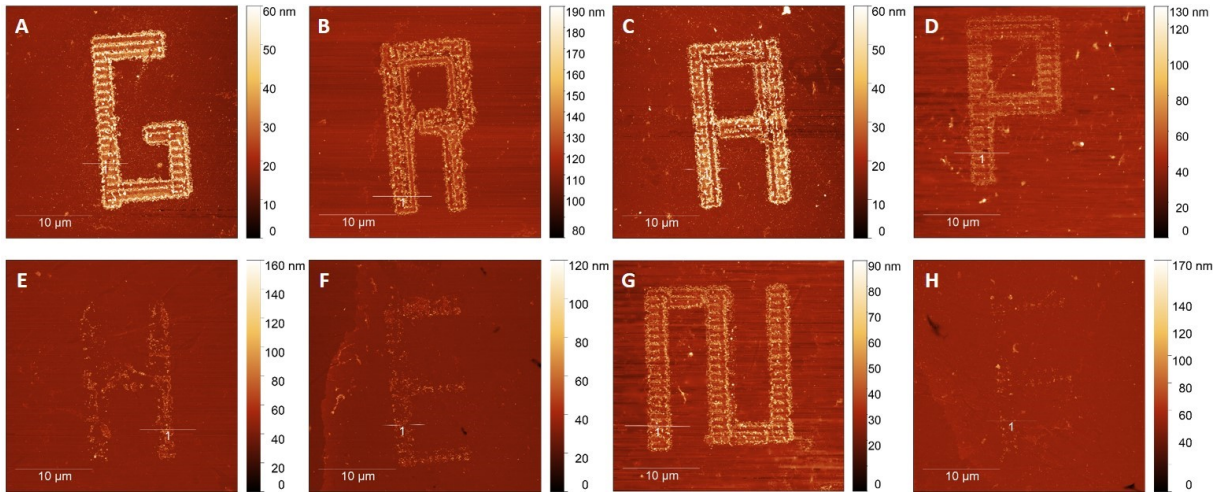

**Figure S5.** AFM images of the samples  $G_{F1}$  (A),  $G_{F2}$  (B),  $G_{F3}$  (C),  $G_{F4}$  (D),  $G_{F5}$  (E),  $G_{F6}$  (F),  $G_{F7}$  (G), and  $G_{F8}$  (H).

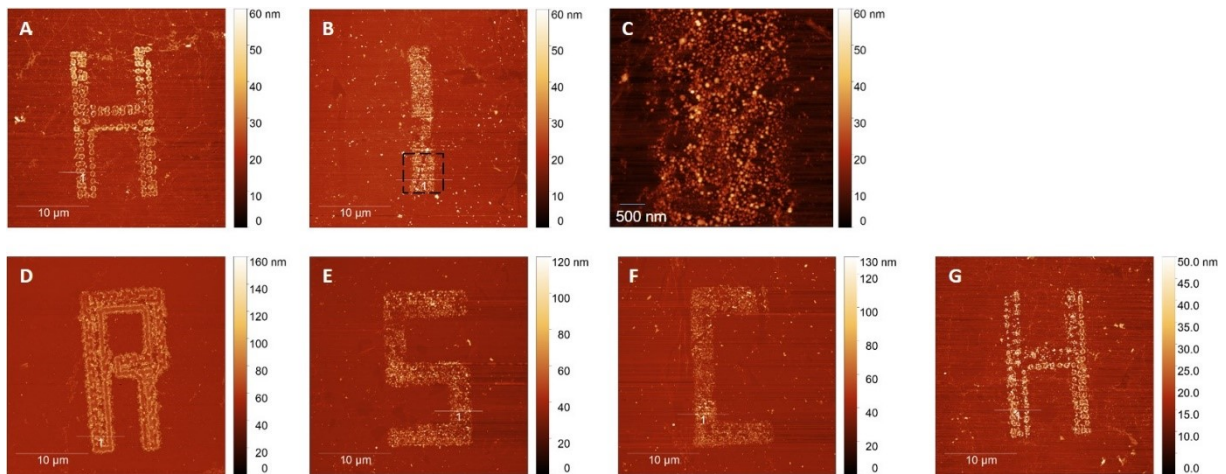

**Figure S6.** AFM images of the samples  $G_{H1}$  (A),  $G_{H2}$  (B),  $G_{H3}$  (D),  $G_{H4}$  (E),  $G_{H5}$  (F), and  $G_{H6}$  (G), and AFM image of the zoomed-in region marked by a black square (C).

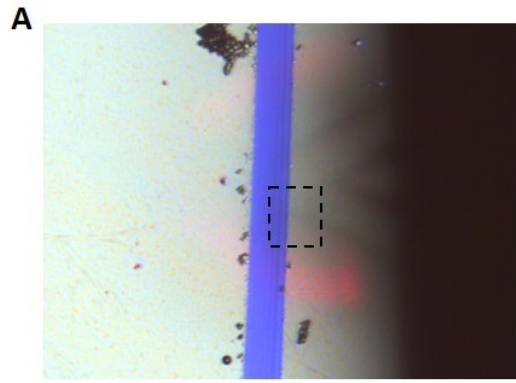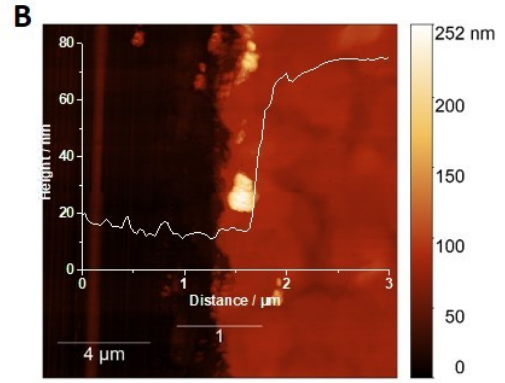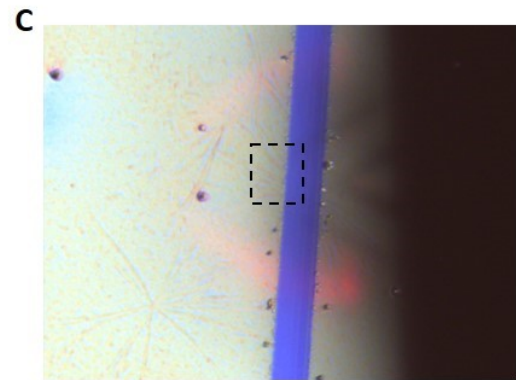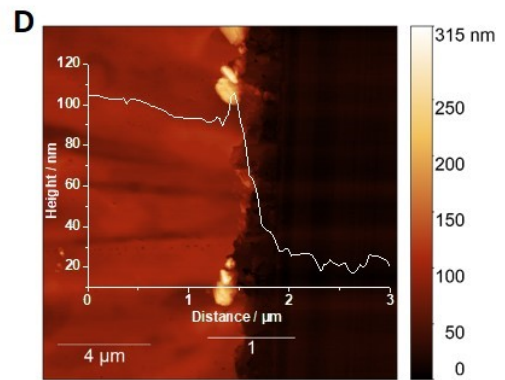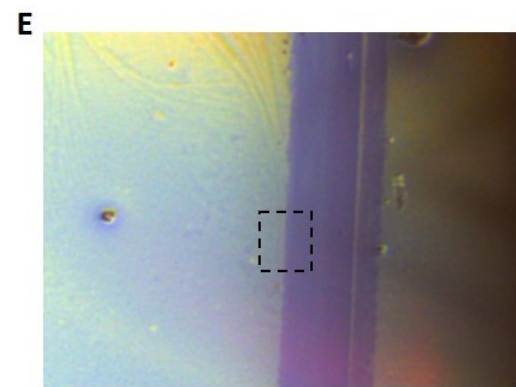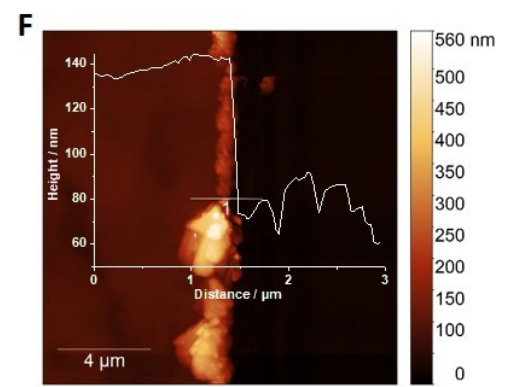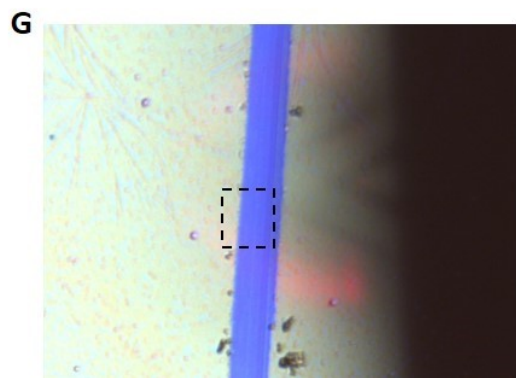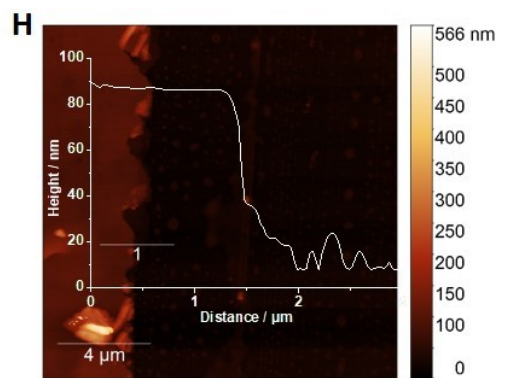

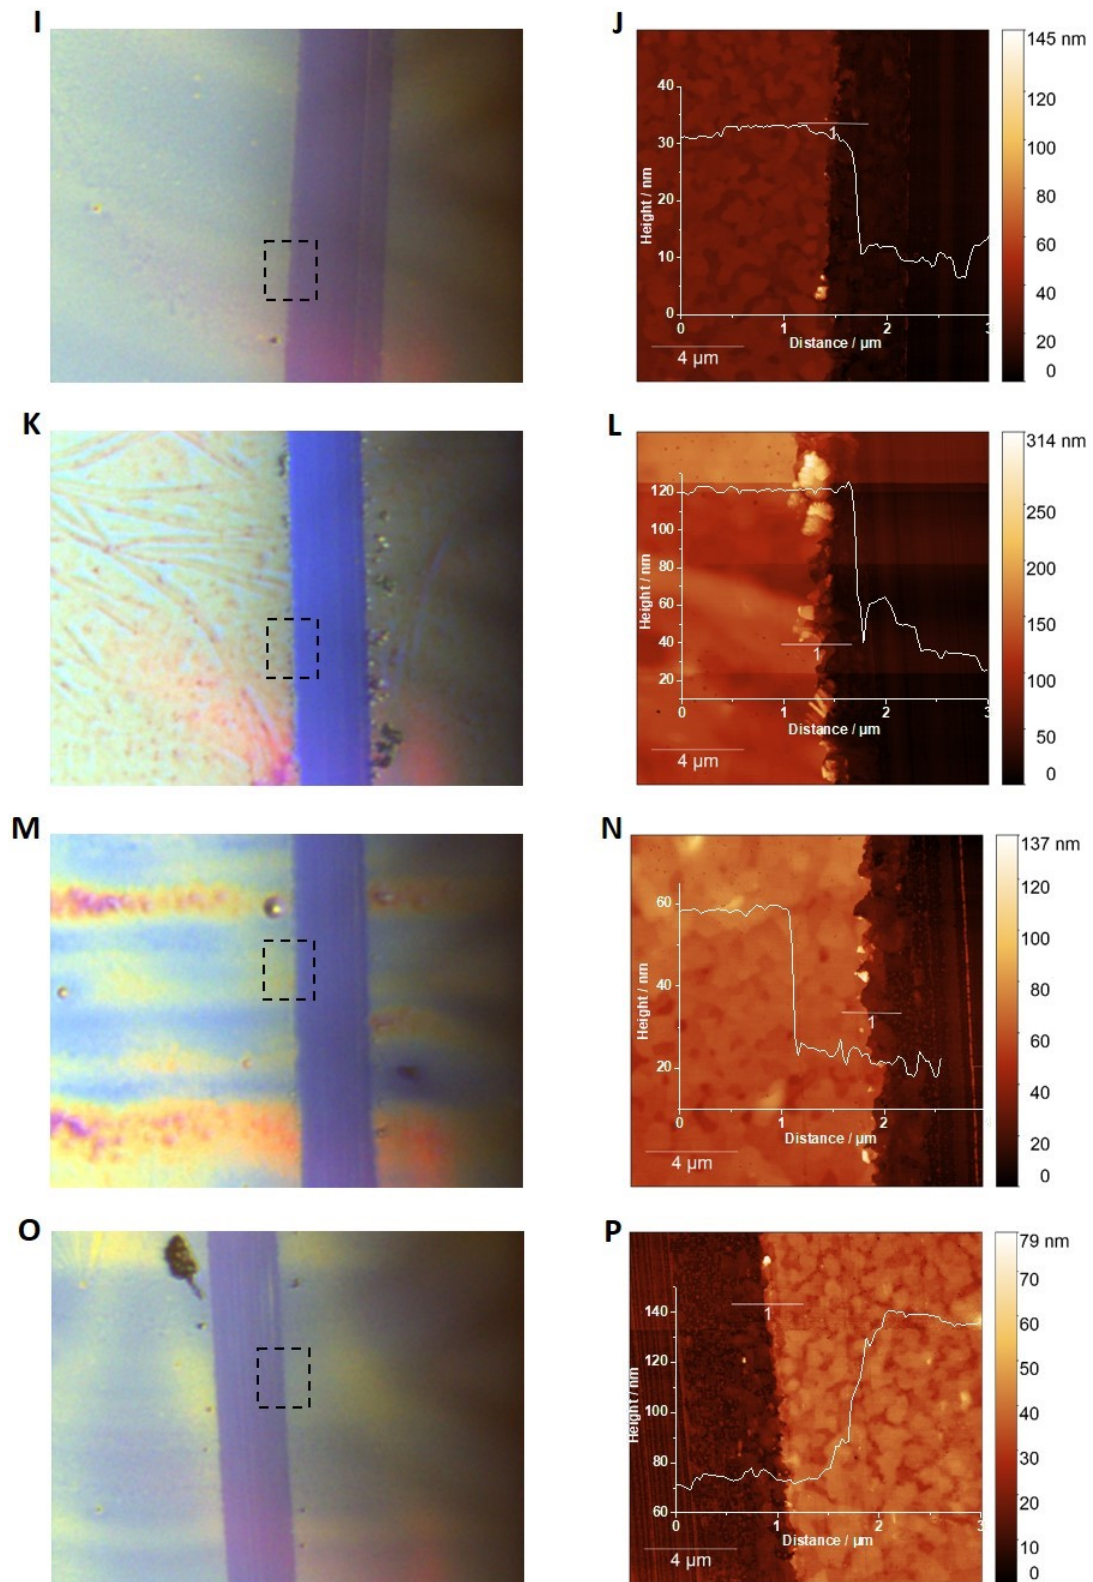

**Figure S7.** Optical images and corresponding AFM images of precursor film in samples  $G_{F1}$  (A, B),  $G_{F2}$  (C, D),  $G_{F3}$  (E, F),  $G_{F4}$  (G, H),  $G_{F5}$  (I, J),  $G_{F6}$  (K, L),  $G_{F7}$  (M, N), and  $G_{F8}$  (O, P). To facilitate the AFM measurements the scratches shown in optical images are implemented on purpose. The black square denotes the location where the AFM characterization has been carried out.

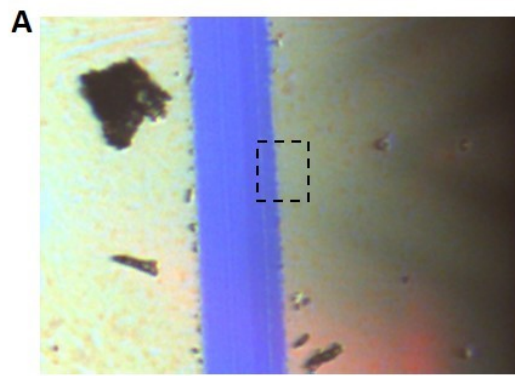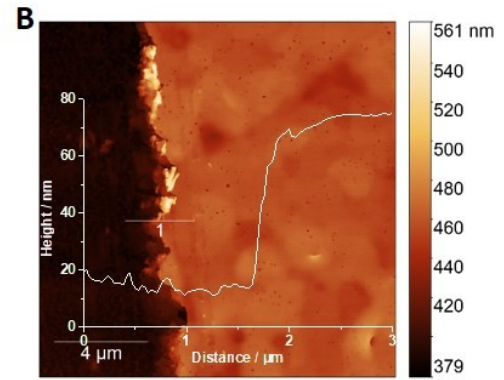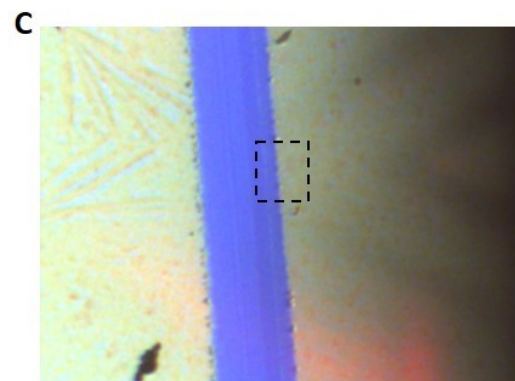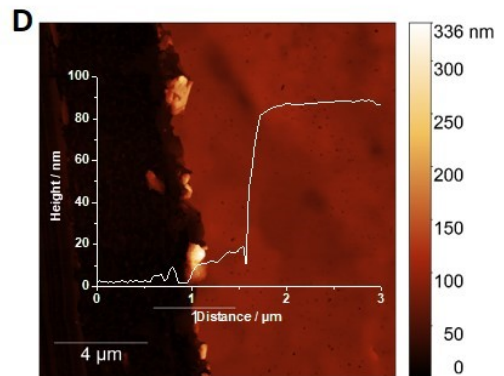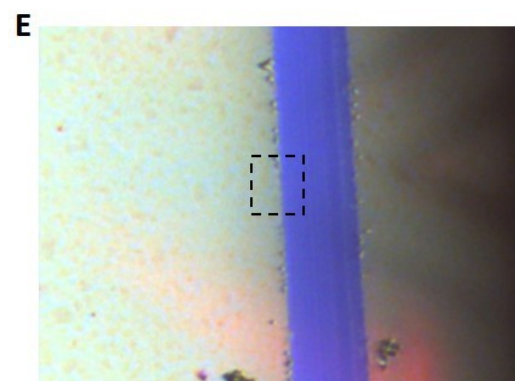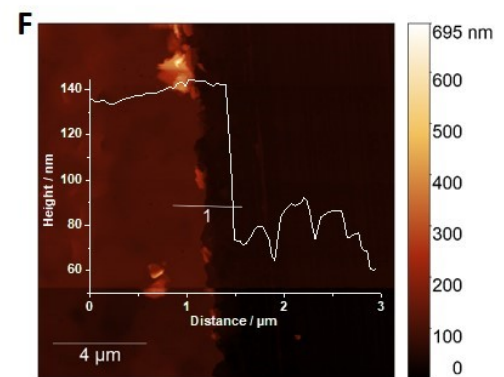

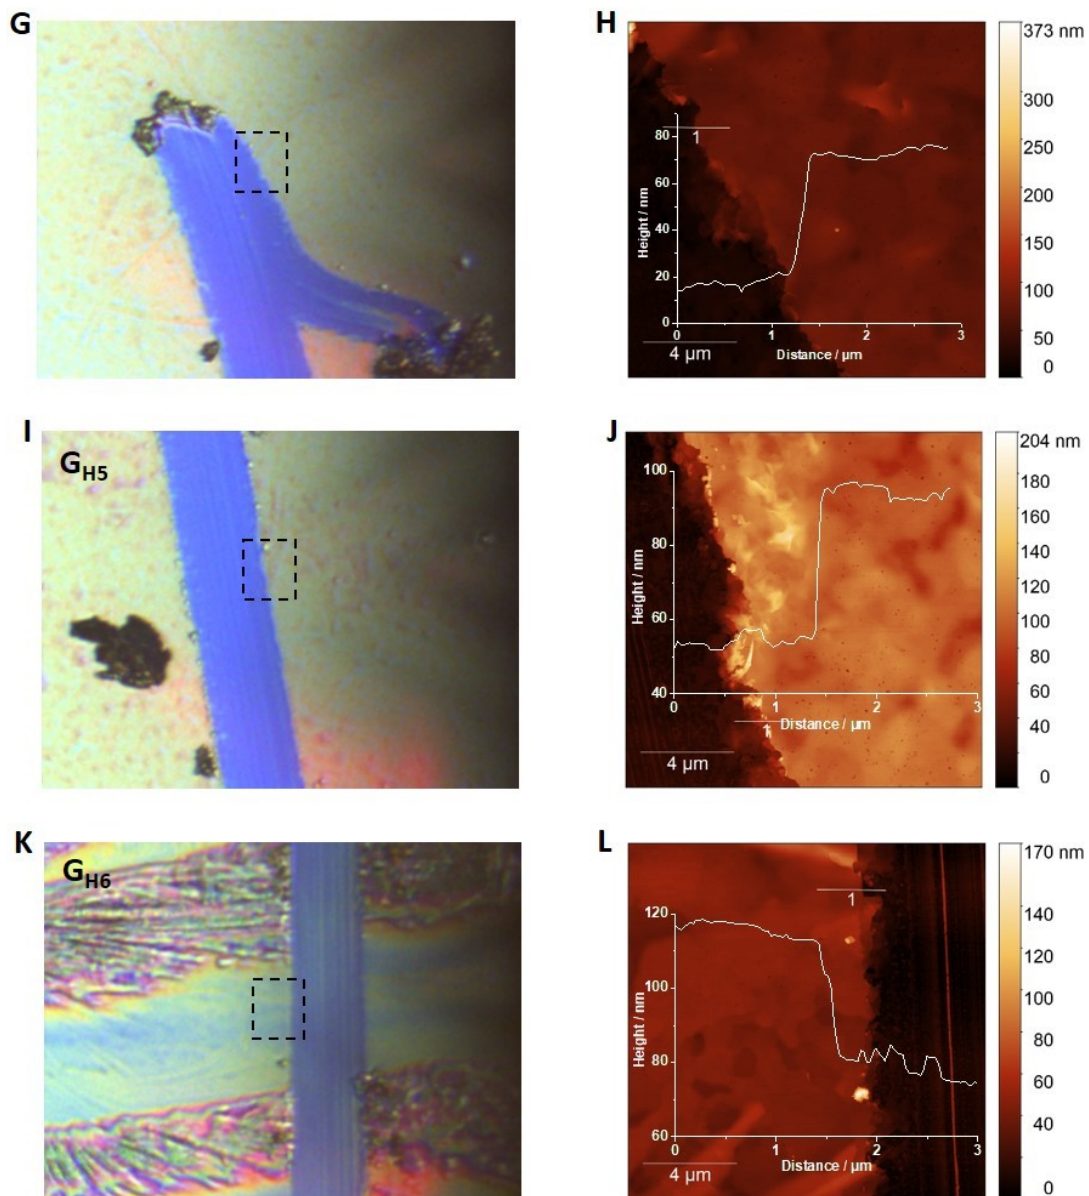

**Figure S7.** Optical images and corresponding AFM images of precursor film in samples  $G_{H1}$  (A, B),  $G_{H2}$  (C, D),  $G_{H3}$  (E, F),  $G_{H4}$  (G, H),  $G_{H5}$  (I, J), and  $G_{H6}$  (K, L). In order to facilitate the AFM measurements the scratches shown in optical images are implemented on purpose. The black square denotes the location where the AFM characterization has been carried out.



**Removal of the silver nanoparticles.** Silver nanoparticles are produced during the laser-writing process and confined to the laser-irradiated regions, presenting the identical patterns as organic addends. To visualize the regular distributions of silver nanoparticles, AFM measurements were performed on graphene samples after laser writing and subsequent removal of excess reagents, revealing a pattern-dependent arrangement of these silver nanoparticles (Figure S5 and S6). On the other hand, the resulting silver particles can be easily removed by a two-step treatment consisting of washing with diluted nitric acid (0.3 mol/L for 10 min) and sequential ultrasonication (30W) in diluted nitric acid (1 min) and isopropanol (1min). For example, after laser writing and subsequent rinse of the residues of reagents, the letter pattern "I" remains visible as shown in the optical image (Figure S 9A) due to the generation of silver particles. This was further confirmed by AFM analysis, which showed that the pattern was composed of silver nanoparticles (Figure S6B and S6C). However, upon washing treatment by submerging the sample in diluted nitric acid (0.3 mol/L) for 10 minutes and a sequential ultrasonic treatment (30 W) in diluted nitric acid (0.3 mol/L) (1 min) and isopropanol (1 min), the patterned silver nanoparticles were eliminated (Figure S9B). The successful removal of silver nanoparticles was corroborated by AFM measurements, where the distinct letter pattern "I" was disappeared (Figure S9C).

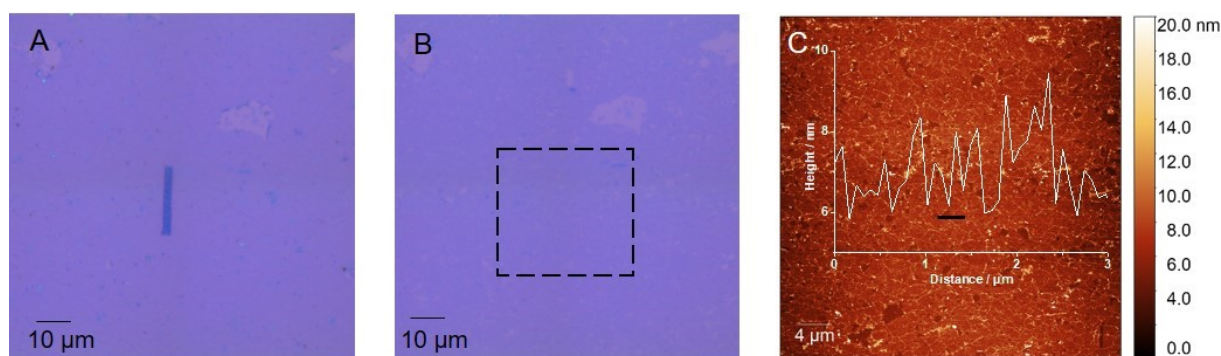

**Figure S9.** Optical images of  $G_{H2}$  before (A) and after (B) removal of silver nanoparticles and the corresponding AFM image after depletion of silver nanoparticles. The black square denotes the location where the AFM characterization has been carried out.

#000669/ROHDE/SRP21/DMSO/13C{19F}/25°C/CHP

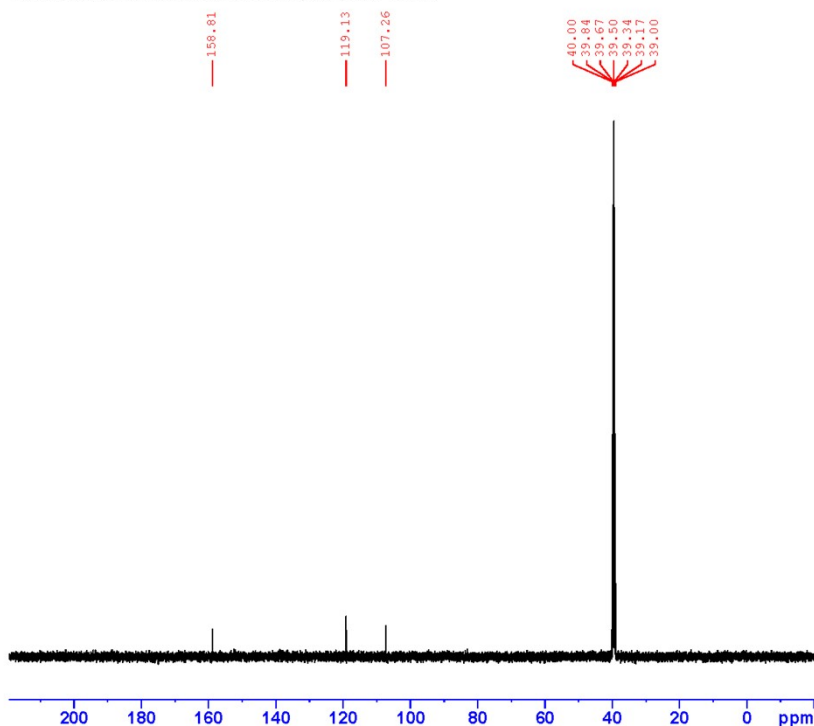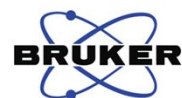

Current Data Parameters  
NAME s5ro00669.SR-P21  
EXPNO 2  
PROCNO 1

F2 - Acquisition Parameters  
Date\_ 20210311  
Time\_ 17.10 h  
INSTRUM CAB AV4 500 MHE BASIC  
PROBHD z128651\_0010 (  
PULPROG zgig30  
TD 32768  
SOLVENT DMSO  
NS 16  
DS 4  
SWH 30120.482 Hz  
FIDRES 1.838408 Hz  
AQ 0.5439488 sec  
RG 101  
DW 16.600 usec  
DE 6.50 usec  
TE 298.2 K  
D1 6.0000000 sec  
D11 0.0300000 sec  
TD0 8  
SFO1 125.8231741 MHz  
NUC1 13C  
FO 5.83 usec  
F1 17.50 usec  
PLW1 17.13599968 W  
SFO2 470.7428960 MHz  
NUC2 19F  
CFDPRG[2] gatr4  
PCPD2 57.38 usec  
PLW2 39.5000000 W  
PLW12 5.46224022 W

F2 - Processing parameters  
SI 32768  
SF 125.8106533 MHz  
WDW EM  
SSB 0  
LB 1.00 Hz  
GB 0  
PC 1.40

Silver carboxylate G<sub>1</sub> F<sub>5</sub>C<sub>3</sub>-COOAg

<sup>19</sup>F<sub>5</sub>C<sub>3</sub>-COOAg

Figure S10. G<sub>F1</sub>, δ<sub>C</sub> (126 MHz, DMSO-d<sub>6</sub>).

#000669/ROHDE/SRP21/DMSO/19F/25°C/CHP

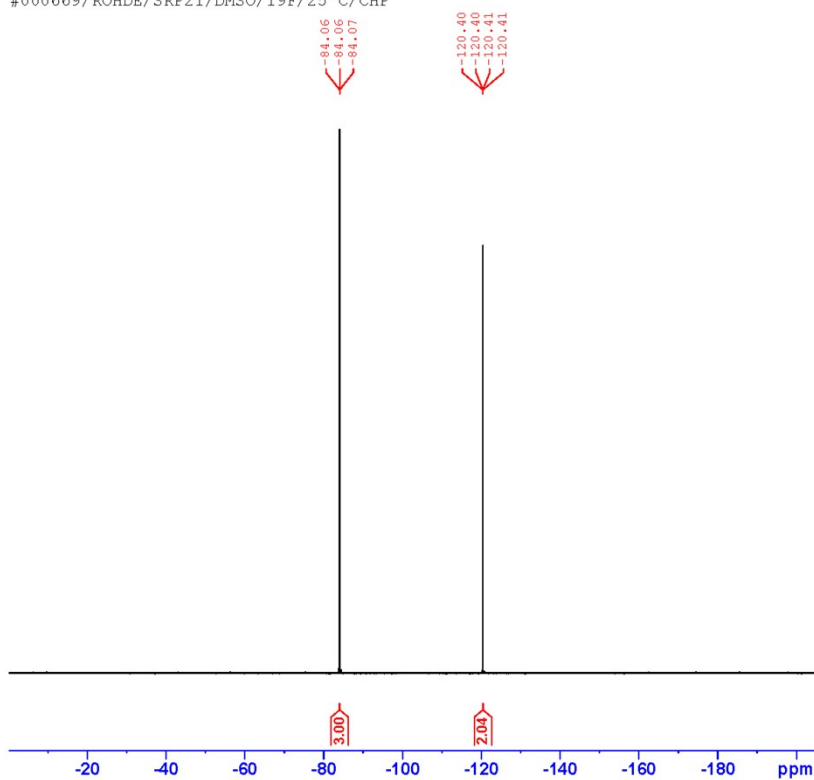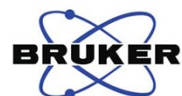

Current Data Parameters  
NAME s5ro00669.SR-P21  
EXFNO 1  
PROCNO 1

F2 - Acquisition Parameters  
Date 20210311  
Time 17.03 h  
INSTRUM CAB AV4 500 MHz BASIC  
PROBHD Z128651\_0010 ( )  
PULPROG zg30  
TD 262144  
SOLVENT DMSO  
NS 4  
DS 0  
SWH 96153.844 Hz  
FIDRES 0.753596 Hz  
AQ 1.3631488 sec  
RG 101  
DW 5.200 usec  
DE 6.50 usec  
TE 298.1 K  
D1 4.0000000 sec  
TE0 1  
SFO1 470.7428956 MHz  
NUC1 19F  
P0 7.33 usec  
P1 22.00 usec  
PLW1 39.5000000 W

F2 - Processing parameters  
SI 131072  
SF 470.7910701 MHz  
WDW no  
SSB 0  
LB 0 Hz  
GB 0  
PC 1.00

Silver carboxylate G<sub>1</sub> F<sub>5</sub>C<sub>3</sub>-COOAg

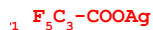

Figure S11. G<sub>F1</sub>, δ<sub>F</sub> (471 MHz, DMSO-d<sub>6</sub>).

#000668/ROHDE/SRP20/CDC13/13C{19F}/25°C/CHP

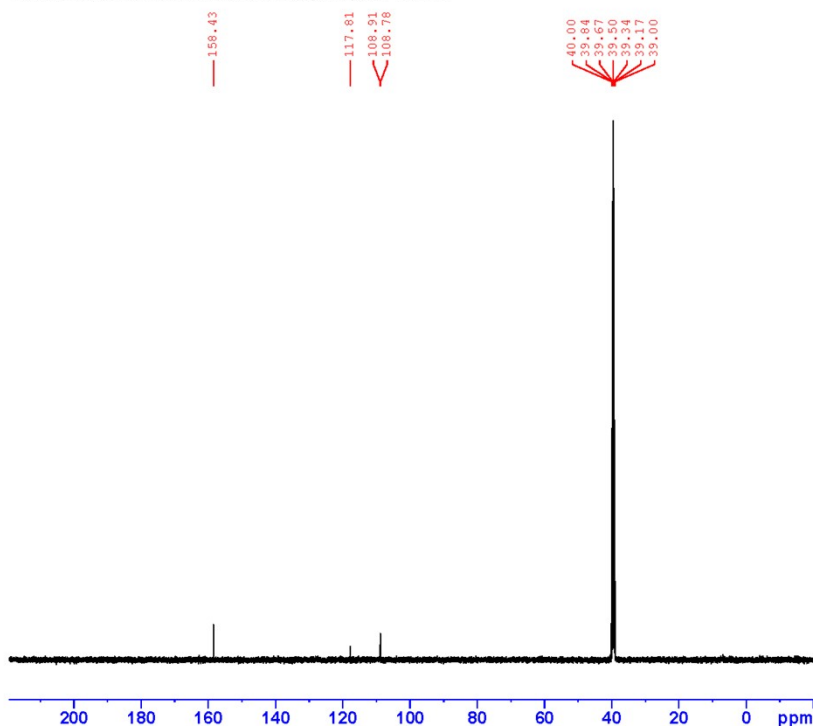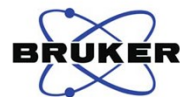

Current Data Parameters  
NAME S5ro000668.8R-P20  
EXPNO 2  
PROCNO 1

F2 - Acquisition Parameters  
Date\_ 20210311  
Time 15.23 h  
INSTRUM CAB AV4 500 MHz BASIC  
PROBHD E128651\_0010 (  
PULPROG zgig  
TD 32768  
SOLVENT DMSO  
NS 184  
DS 0  
SWH 30120.482 Hz  
FIDRES 1.838408 Hz  
AQ 0.5439488 sec  
RG 101  
DW 16.600 usec  
DE 6.50 usec  
TE 298.1 K  
D1 8.0000000 sec  
D11 0.0300000 sec  
TD0 1  
SF01 125.8231741 MHz  
NUC1 13C  
P1 17.50 usec  
PLW1 17.1359968 W  
SFO2 470.7414836 MHz  
NUC2 19F  
CFDPRG2 garp4  
PCPD2 59.32 usec  
PLW2 39.5000000 W  
PLW12 5.46224022 W

F2 - Processing parameters  
SI 32768  
SF 125.8106538 MHz  
WDW EM  
SSB 0  
LB 1.00 Hz  
GB 0  
PC 1.40

Silver carboxylate G<sub>2</sub> F<sub>7</sub>C<sub>3</sub>-COOAg

Figure S12.  $G_{F_2}$ ,  $\delta_C$  (126 MHz, DMSO- $d_6$ ).

#000668/ROHDE/SRP20/CDC13/19F/25°C/CHP

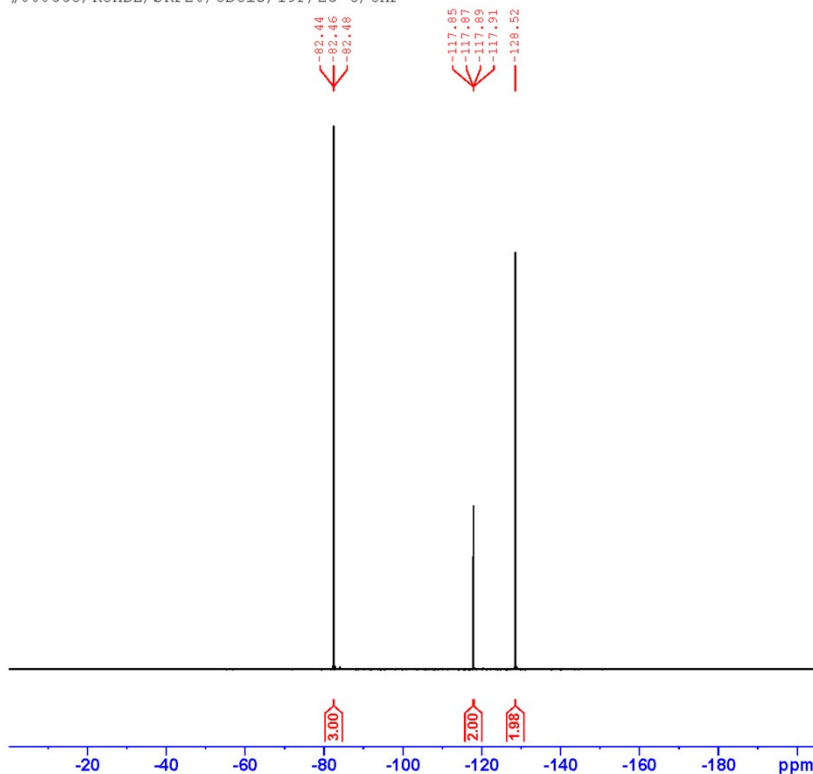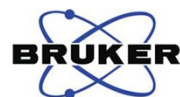

Current Data Parameters  
NAME S5ro000668.8R-P20  
EXPNO 1  
PROCNO 1

F2 - Acquisition Parameters  
Date\_ 20210311  
Time 14.43 h  
INSTRUM CAB AV4 500 MHz BASIC  
PROBHD Z128651\_0010 (  
PULPROG zg30  
TD 262144  
SOLVENT DMSO  
NS 8  
DS 0  
SWH 96153.844 Hz  
FIDRES 0.733596 Hz  
AQ 1.3631488 sec  
RG 101  
DW 5.200 usec  
DE 6.50 usec  
TE 298.1 K  
D1 4.0000000 sec  
TD0 1  
SF01 470.7428956 MHz  
NUC1 19F  
P1 7.33 usec  
PLW1 22.00 usec  
PLW1 39.5000000 W

F2 - Processing parameters  
SI 131072  
SF 470.7910701 MHz  
WDW EM  
SSB 0  
LB 0.30 Hz  
GB 0  
PC 1.00

Silver carboxylate G<sub>2</sub> F<sub>7</sub>C<sub>3</sub>-COOAg

Figure S13.  $G_{F_2}$ ,  $\delta_F$  (471 MHz, DMSO- $d_6$ ).

#000670/ROHDE/SRP22/DMSO/13C{19F}/25°C/CHP

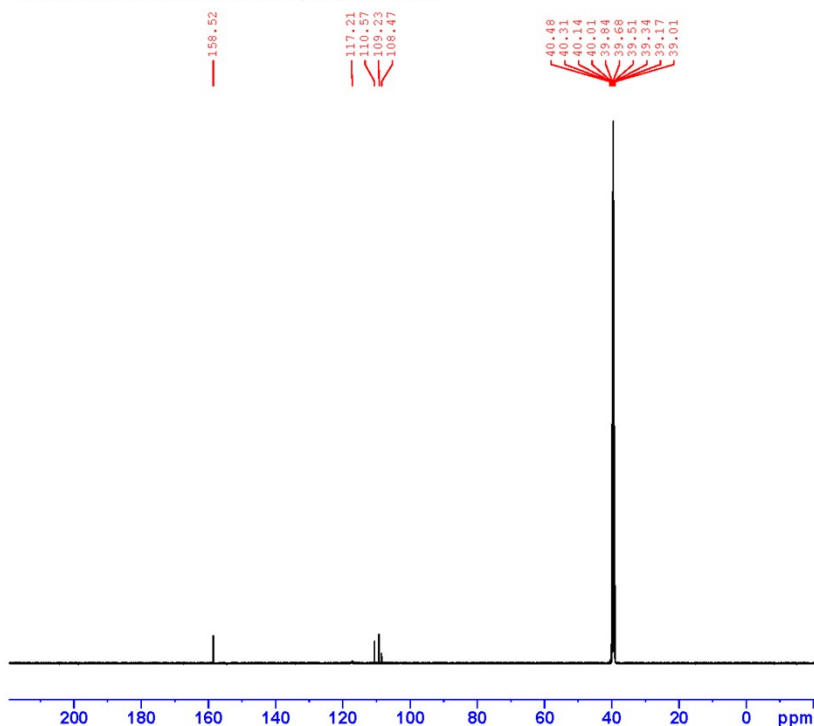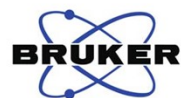

Current Data Parameters  
NAME S5ro000670.SR-P22  
EXPNO 2  
PROCNO 1

F2 - Acquisition Parameters  
Date\_ 20210311  
Time 20.05 h  
INSTRUM CAB AV4 500 Mhz BASIC  
PROBHD z128651\_0010 (z)  
PULPROG zgpg30  
TD 32768  
SOLVENT DMSO  
NS 1024  
DS 4  
SWH 30120.482 Hz  
FIDRES 1.838408 Hz  
AQ 0.5439488 sec  
RG 101  
DM 16.600 usec  
DE 6.50 usec  
TE 298.1 K  
D1 7.00000000 sec  
D11 0.03000000 sec  
TDO 1  
SF01 125.8231741 MHz  
NUC1 13C  
P0 5.83 usec  
P1 17.50 usec  
PLW1 17.13599968 W  
SFO2 470.7407774 MHz  
NUC2 19F  
CPDPRG2 garp4  
PCPD2 58.33 usec  
PLW2 39.50000000 W  
PLW12 5.61830378 W

F2 - Processing parameters  
SI 32768  
SF 125.8106521 MHz  
WDW EM  
SSB 0  
LB 1.00 Hz  
GB 0  
PC 1.40

Silver carboxylate G<sub>3</sub> F<sub>3</sub>C<sub>4</sub>-COOAg

Figure S14. G<sub>F3</sub>,  $\delta_C$  (126 MHz, DMSO-*d*<sub>6</sub>).

#000670/ROHDE/SRP22/DMSO/19F/25°C/CHP

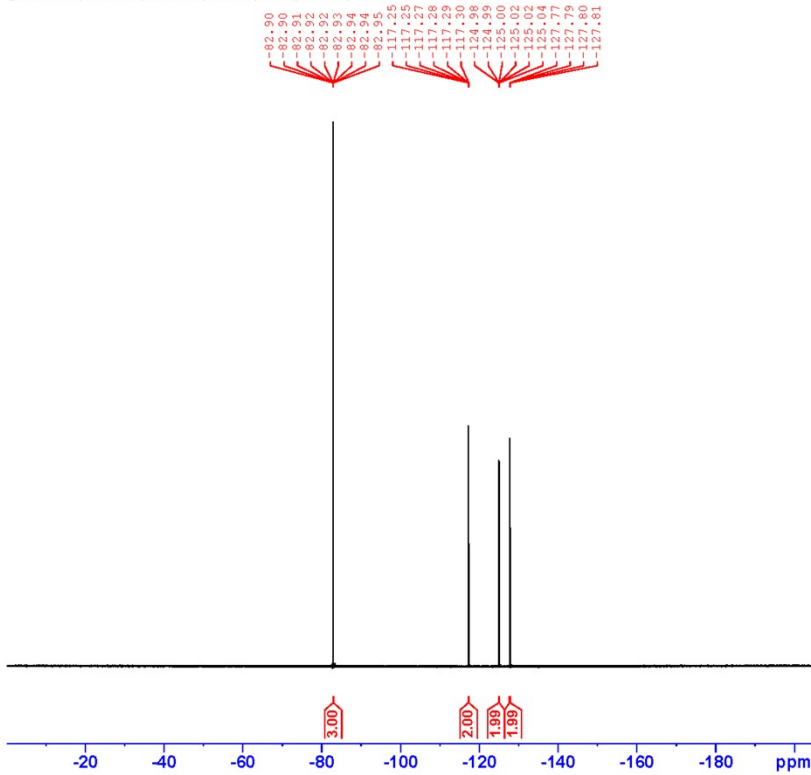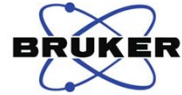

Current Data Parameters  
NAME s5ro000670.SR-P22  
EXPNO 1  
PROCNO 1

F2 - Acquisition Parameters  
Date\_ 20210311  
Time\_ 17.43 h  
INSTRUM CAB AV4 500 MHz BASIC  
PROBHD Z128651 0010 (  
PULPROG zg30  
TD 262144  
SOLVENT DMSO  
NS 8  
DS 0  
SWH 96153.844 Hz  
FIDRES 0.733596 Hz  
AQ 1.3631488 sec  
RG 101  
DW 5.200 usec  
DE 6.50 usec  
TE 298.1 K  
D1 4.00000000 sec  
TD0 1  
SFO1 470.7428956 MHz  
NUC1 19F  
P0 7.33 usec  
F1 22.00 usec  
PLW1 39.50000000 W

F2 - Processing parameters  
SI 121072  
SF 470.7910701 MHz  
WDW EM  
SSB 0  
LB 0.30 Hz  
GB 0  
PC 1.00

Silver carboxylate G<sub>3</sub> F<sub>3</sub>C-COOAg

Figure S15. G<sub>F3</sub>, δ<sub>F</sub> (471 MHz, DMSO-d<sub>6</sub>).

#000677/ROHDE/SR\_P23/DMSO/13C{19F}/25°C/CHP

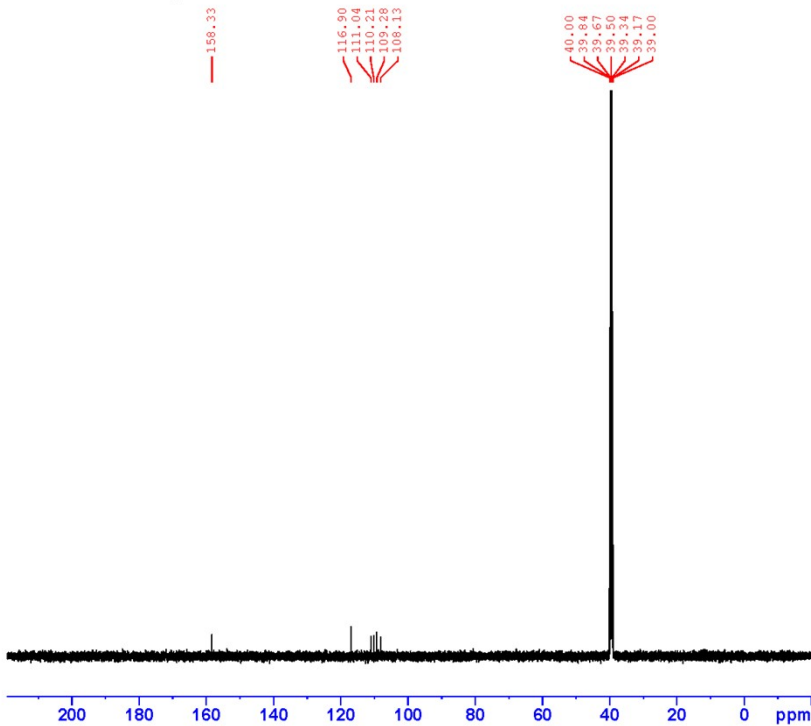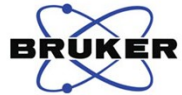

Current Data Parameters  
NAME s5ro000677.SR-P23  
EXPNO 2  
PROCNO 1

F2 - Acquisition Parameters  
Date\_ 20210318  
Time\_ 19.37 h  
INSTRUM CAB AV4 500 MHz BASIC  
PROBHD Z128651 0010 (  
PULPROG zgig30  
TD 32768  
SOLVENT DMSO  
NS 41  
DS 4  
SWH 30120.482 Hz  
FIDRES 1.938408 Hz  
AQ 0.5439488 sec  
RG 101  
DW 16.600 usec  
DE 6.50 usec  
TE 298.2 K  
D1 6.00000000 sec  
D11 0.03000000 sec  
TD0 1  
SFO1 125.8231741 MHz  
NUC1 13C  
P0 5.83 usec  
F1 17.50 usec  
PLW1 17.13599968 W  
SFO2 470.7417190 MHz  
NUC2 19F  
CPDPRG2 garp4  
PCPD2 49.65 usec  
PLW2 39.50000000 W  
PLW12 7.80319977 W

F2 - Processing parameters  
SI 22768  
SF 125.8106541 MHz  
WDW EM  
SSB 0  
LB 1.00 Hz  
GB 0  
PC 1.40

Silver carboxylate G<sub>4</sub> F<sub>11</sub>C<sub>3</sub>-COOAg

Figure S16. G<sub>F4</sub>, δ<sub>C</sub> (126 MHz, DMSO-d<sub>6</sub>).

#000677/ROHDE/SR\_P23/DMSO/19F/25°C/CHP

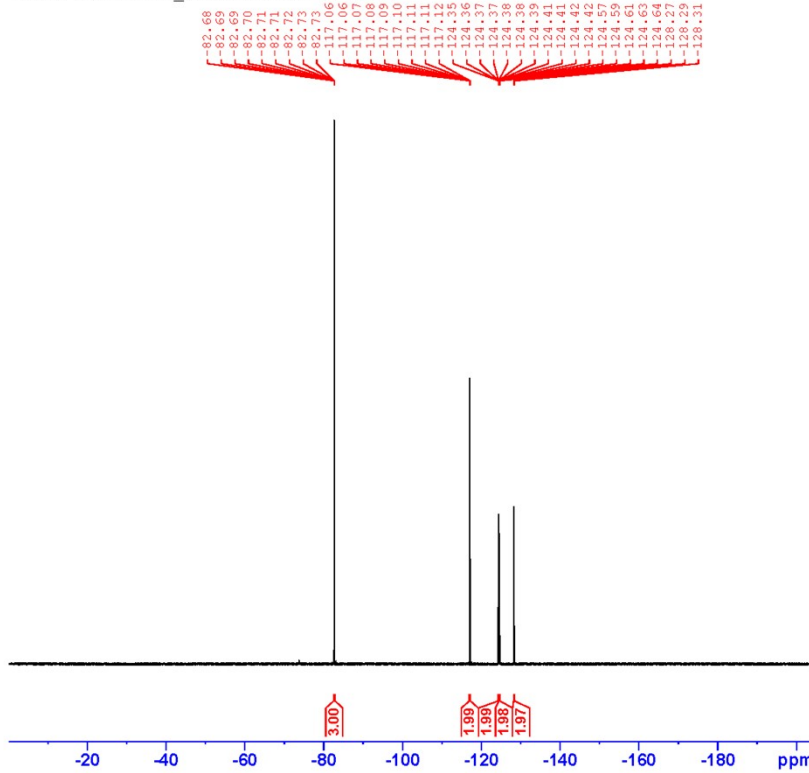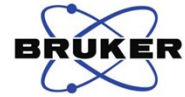

Current Data Parameters  
NAME S5ro000677.SR-F23  
EXPNO 1  
PROCNO 1

F2 - Acquisition Parameters  
Date\_ 20210318  
Time\_ 19.26 h  
INSTRUM CAB AV4 500 MHz BASIC  
PROBHD Z128651\_0010 (   
PULPROG zg30  
TD 262144  
SOLVENT DMSO  
NS 16  
DS 0  
SWH 96153.844 Hz  
FIDRES 0.733596 Hz  
AQ 1.3631488 sec  
RG 101  
DM 5.200 usec  
DE 6.50 usec  
TE 298.2 K  
D1 4.0000000 sec  
TD0 1  
SFO1 470.7428956 MHz  
NUC1 19F  
P0 7.33 usec  
F1 22.00 usec  
PLW1 39.5000000 W

F2 - Processing parameters  
SI 131072  
SF 470.7910701 MHz  
WDW EM  
SSB 0  
LB 0.30 Hz  
GB 0  
PC 1.00

Silver carboxylate G4 F13C5-COOAg

Figure S17.  $G_{F4}$ ,  $\delta_F$  (471 MHz, DMSO- $d_6$ ).

#000678/ROHDE/SR-P24/DMSO/13C{19F}/25°C/CHP

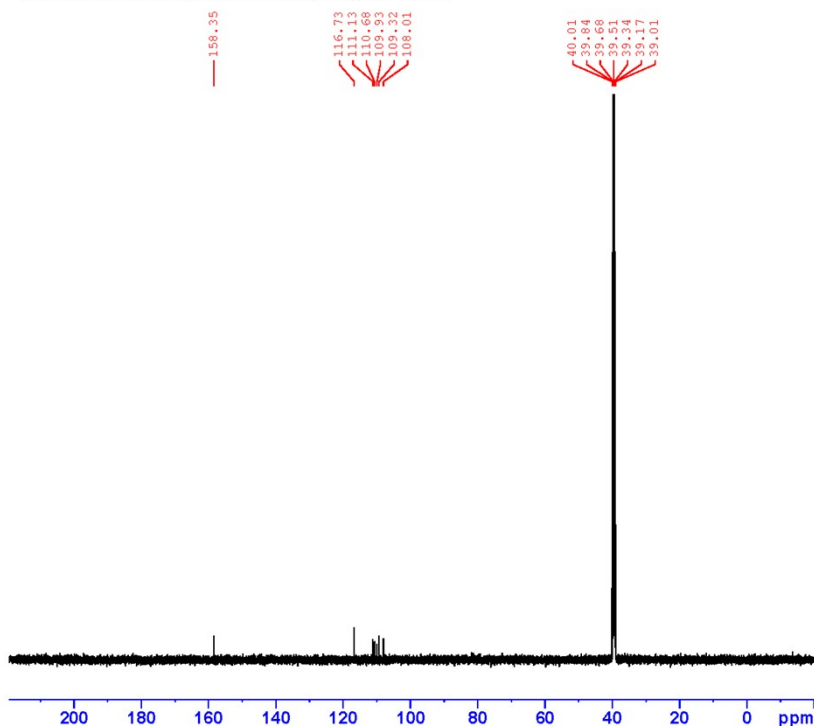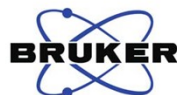

Current Data Parameters  
NAME s5ro000678.SR-P24  
EXPNO 2  
PROCNO 1

F2 - Acquisition Parameters  
Date\_ 20210318  
Time 20.50 h  
INSTRUM CAB AV4 500 MHz BASIC  
PROBHD Z128651\_0010 ( )  
PULPROG zgig30  
TD 32768  
SOLVENT DMSO  
NS 64  
DS 4  
SWH 30120.482 Hz  
FIDRES 1.838408 Hz  
AQ 0.5439488 sec  
RG 101  
DW 16.600 usec  
DE 6.50 usec  
TE 298.1 K  
D1 7.00000000 sec  
D11 0.03000000 sec  
TD0 1  
SF01 125.8231741 MHz  
NUC1 13C  
P0 5.83 usec  
P1 17.50 usec  
PLW1 17.1359968 W  
SFO2 470.7414836 MHz  
NUC2 19F  
CFDPRG2 garp4  
PCPD2 49.65 usec  
PLW2 39.5000000 W  
PLW12 7.80319977 W

F2 - Processing parameters  
SI 32768  
SF 125.8106531 MHz  
WDW EM  
SSB 0  
LB 1.00 Hz  
GB 0  
PC 1.40

Silver carboxylate G<sub>5</sub> F<sub>13</sub>C<sub>6</sub>-COOAg

Figure S18. G<sub>5</sub>,  $\delta_C$  (126 MHz, DMSO-*d*<sub>6</sub>).

#000678/ROHDE/SR-P24/DMSO/19F/25°C/CHP

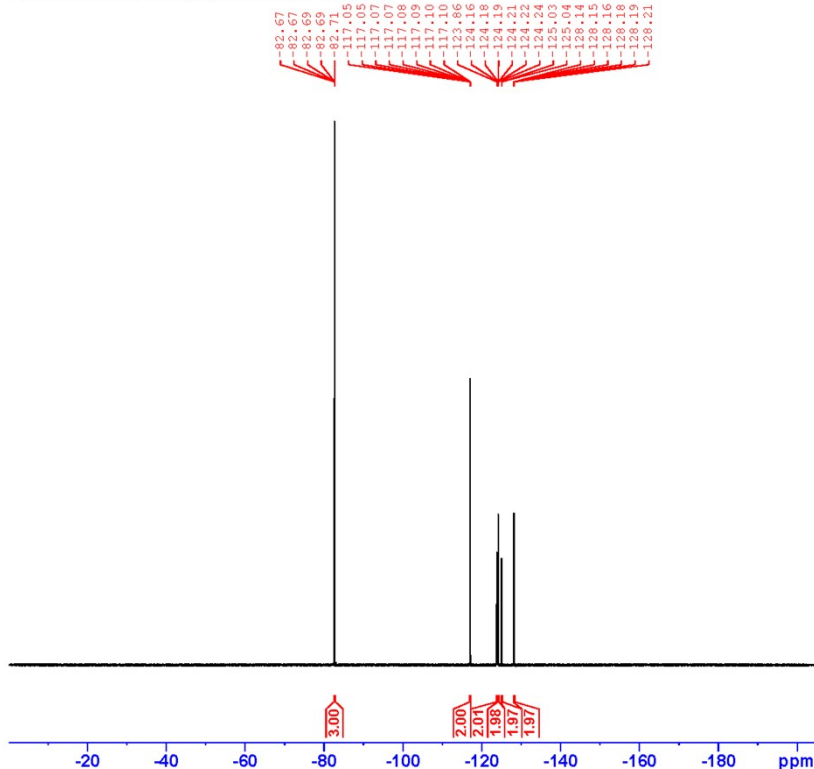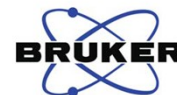

Current Data Parameters  
NAME s5ro000678.SR-P24  
EXPNO 1  
PROCNO 1

F2 - Acquisition Parameters  
Date\_ 20210318  
Time 20.38 h  
INSTRUM CAB AV4 500 MHz BASIC  
PROBHD Z128651\_0010 ( )  
PULPROG zg30  
TD 262144  
SOLVENT DMSO  
NS 16  
DS 0  
SWH 96153.844 Hz  
FIDRES 0.733596 Hz  
AQ 1.3631488 sec  
RG 101  
DW 5.200 usec  
DE 6.50 usec  
TE 298.1 K  
D1 4.00000000 sec  
D11 1  
SF01 470.7428956 MHz  
NUC1 19F  
P0 7.33 usec  
P1 22.00 usec  
PLW1 39.5000000 W

F2 - Processing parameters  
SI 131072  
SF 470.7910701 MHz  
WDW EM  
SSB 0  
LB 0.30 Hz  
GB 0  
PC 1.00

Silver carboxylate G<sub>5</sub> F<sub>13</sub>C<sub>6</sub>-COOAg

Figure S19. G<sub>5</sub>,  $\delta_F$  (471 MHz, DMSO-*d*<sub>6</sub>).



#000680/ROHDE/SR-P25/DMSO/13C{19F}/25°C/CHP

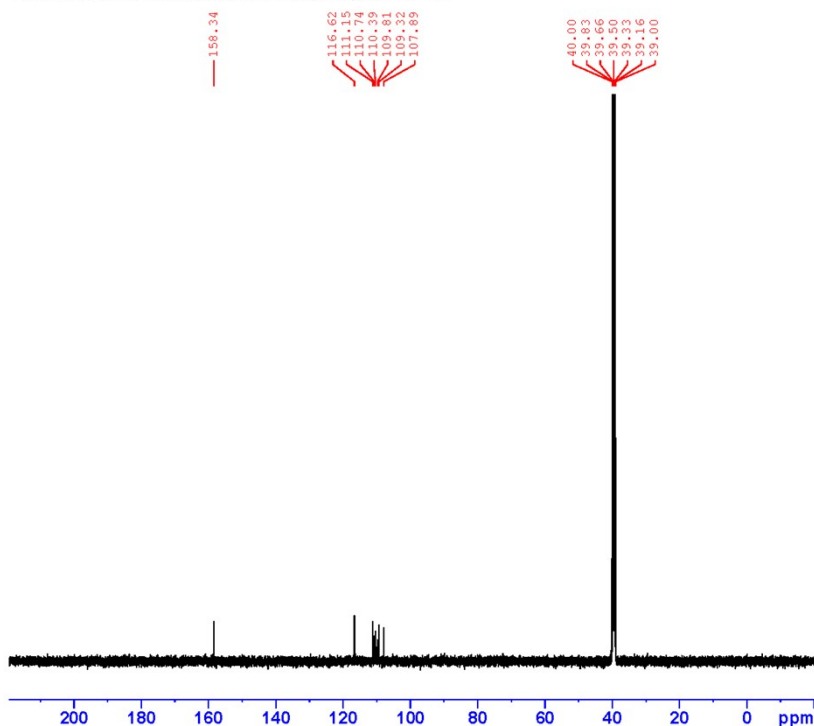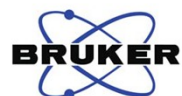

Current Data Parameters  
NAME s5ro000680.SR-P25  
EXPNO 2  
PROCNO 1

F2 - Acquisition Parameters  
Date 20210322  
Time 12.25 h  
INSTRUM CAB AV4 500 MHz BASIC  
PROBHD Z128651\_0010 ( )  
PULPROG zgig30  
TD 32768  
SOLVENT DMSO  
NS 128  
DS 4  
SWH 30120.482 Hz  
FIDRES 1.838488 Hz  
AQ 0.5429488 sec  
RG 101  
DM 16.600 usec  
DE 6.50 usec  
TE 298.1 K  
D1 7.00000000 sec  
D11 0.03000000 sec  
TD0 1  
SF01 125.8231741 MHz  
NUC1 13C  
P0 5.83 usec  
P1 17.50 usec  
PLW1 17.1359968 W  
SFO2 470.7414836 MHz  
NUC2 19F  
CPDPRG2 gacp4  
PCPD2 49.65 usec  
FLW2 39.5000000 W  
FLW12 7.80319977 W

F2 - Processing parameters  
SI 32768  
SF 125.8106546 MHz  
WDW EM  
SSB 0  
LB 1.00 Hz  
GB 0  
PC 1.40

Silver carboxylate G<sub>6</sub> F<sub>15</sub>C<sub>7</sub>-COOAg

Figure S20. G<sub>F6</sub>, δ<sub>C</sub> (126 MHz, DMSO-d<sub>6</sub>).

#000680/ROHDE/SR-P25/DMSO/19F/25°C/CHP

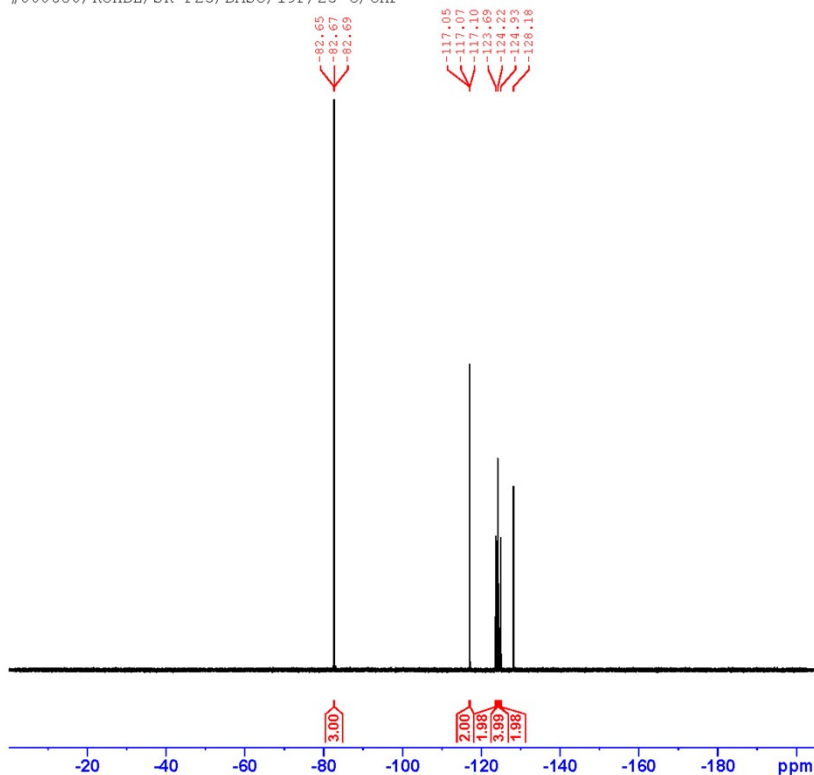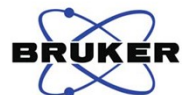

Current Data Parameters  
NAME s5ro000680.SR-P25  
EXPNO 1  
PROCNO 1

F2 - Acquisition Parameters  
Date 20210322  
Time 12.03 h  
INSTRUM CAB AV4 500 MHz BASIC  
PROBHD Z128651\_0010 ( )  
PULPROG zg30  
TD 262144  
SOLVENT DMSO  
NS 16  
DS 0  
SWH 96153.844 Hz  
FIDRES 0.733596 Hz  
AQ 1.3631488 sec  
RG 101  
DM 5.200 usec  
DE 6.50 usec  
TE 298.2 K  
D1 4.00000000 sec  
TD0 1  
SF01 470.7428956 MHz  
NUC1 19F  
P0 7.33 usec  
P1 22.00 usec  
PLW1 39.5000000 W

F2 - Processing parameters  
SI 131072  
SF 470.7910701 MHz  
WDW no  
SSB 0  
LB 0 Hz  
GB 0  
PC 1.00

Silver carboxylate G<sub>6</sub> F<sub>15</sub>C<sub>7</sub>-COOAg

Figure S21. G<sub>F6</sub>, δ<sub>F</sub> (471 MHz, DMSO-d<sub>6</sub>).

#000681/ROHDE/SR\_P26/DMSO/13C{1H,19F}/25°C/CHP

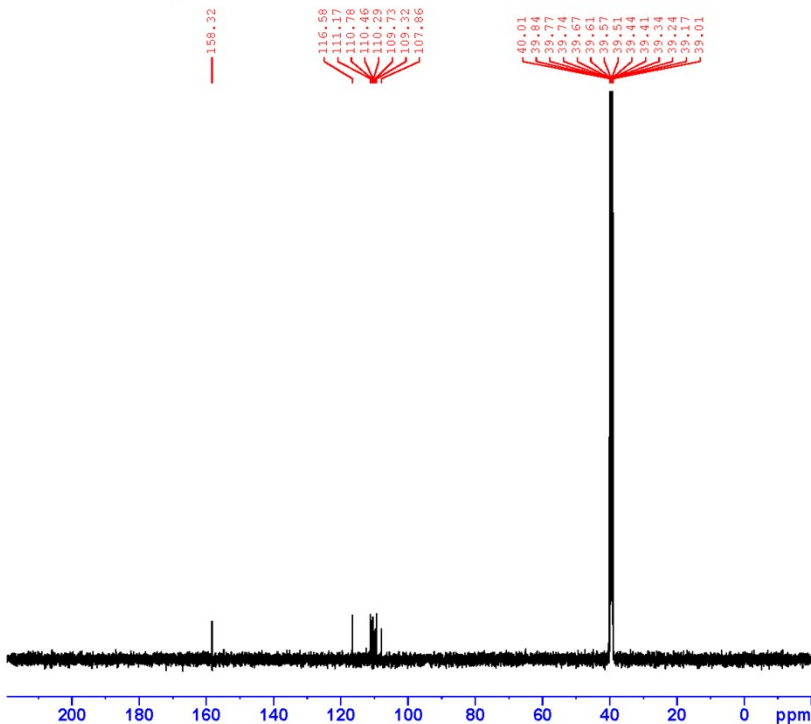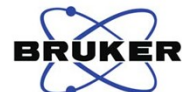

Current Data Parameters  
 NAME S5ro000681.SR-P26  
 EXFNO 2  
 PROCNO 1

F2 - Acquisition Parameters  
 Date\_ 20210323  
 Time\_ 12.27 h  
 INSTRUM CAB AV4 500 MHz BASIC  
 PROBHD Z173362\_0004 (  
 PULPROG zgig30  
 TD 16384  
 SOLVENT DMSO  
 NS 160  
 DS 4  
 SWH 30120.482 Hz  
 FIDRES 3.676817 Hz  
 AQ 0.2719744 sec  
 RG 101  
 DW 16.600 usec  
 DE 8.50 usec  
 TE 298.1 K  
 D1 12.0000000 sec  
 D11 0.0300000 sec  
 TDO 1  
 SFO1 125.8231741 MHz  
 NUC1 13C  
 P0 3.33 usec  
 F1 10.00 usec  
 PLW1 78.56199646 W  
 SFO2 470.7417190 MHz  
 NUC2 19F  
 CPDPRG2 gatr4  
 PCPD2 49.65 usec  
 PLW2 46.52899933 W  
 PLW12 11.86960030 W

F2 - Processing parameters  
 SI 32768  
 SF 125.810652 MHz  
 WDW EM  
 SSB 0  
 LB 1.00 Hz  
 GB 0  
 PC 1.40

Silver carboxylate Gr7 F<sub>19</sub>C<sub>8</sub>-COOAg

Figure S22. G<sub>F7</sub>, δ<sub>C</sub> (126 MHz, DMSO-d<sub>6</sub>).

Figure S23. G<sub>F7</sub>, δ<sub>F</sub> (471 MHz, DMSO-d<sub>6</sub>).

#000693/ROHDE/SR-P26\_A/DMSO/13C{19F}/25°C/CHP

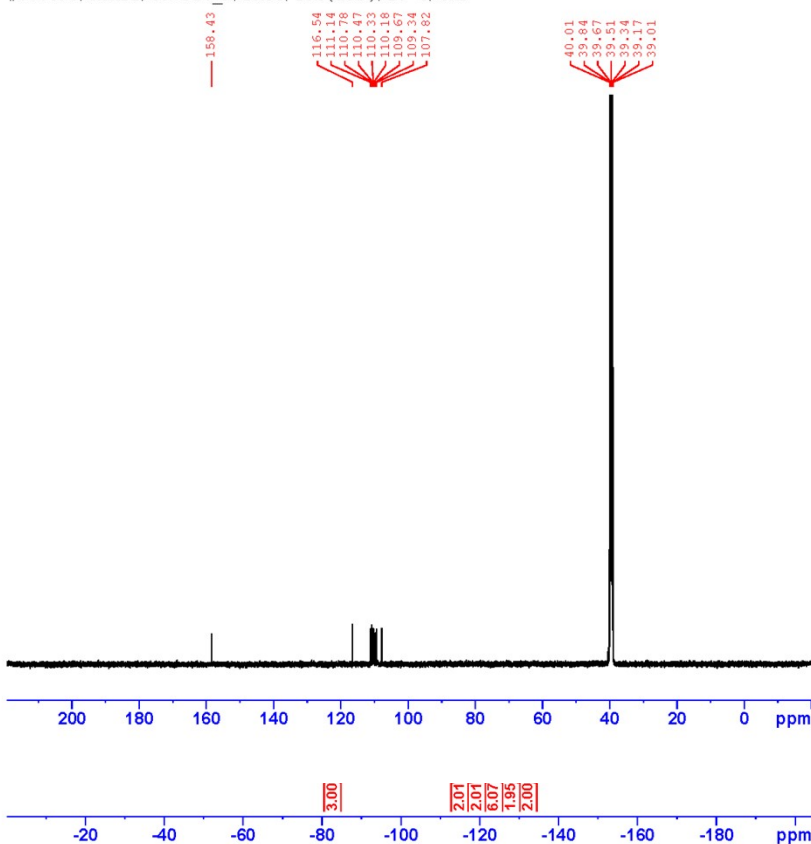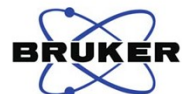

Current Data Parameters  
 NAME S5ro000693.SR-P26A  
 EXFNO 2  
 PROCNO 1

F2 - Acquisition Parameters  
 Date\_ 20210330  
 Time\_ 19.35 h  
 INSTRUM CAB AV4 500 MHz BASIC  
 PROBHD Z128651\_0010 (  
 PULPROG zgig30  
 TD 32768  
 SOLVENT DMSO  
 NS 1024  
 DS 0  
 SWH 30120.482 Hz  
 FIDRES 1.838408 Hz  
 AQ 0.5439488 sec  
 RG 101  
 DW 16.600 usec  
 DE 8.50 usec  
 TE 298.1 K  
 D1 9.0000000 sec  
 D11 0.0300000 sec  
 TDO 1  
 SFO1 125.8231741 MHz  
 NUC1 13C  
 P0 5.83 usec  
 F1 17.50 usec  
 PLW1 17.13599968 W  
 SFO2 470.7414836 MHz  
 NUC2 19F  
 CPDPRG2 gatr4  
 PCPD2 49.65 usec  
 PLW2 39.5000000 W  
 PLW12 7.80319977 W

F2 - Processing parameters  
 SI 32768  
 SF 125.8106525 MHz  
 WDW EM  
 SSB 0  
 LB 1.00 Hz  
 GB 0  
 PC 1.40

Silver carboxylate Gr8 F<sub>19</sub>C<sub>9</sub>-COOAg

Figure S24. G<sub>F8</sub>, δ<sub>C</sub> (126 MHz, DMSO-d<sub>6</sub>).

#000693/ROHDE/SR-P26\_A/DMSO/19F/25°C/CHP

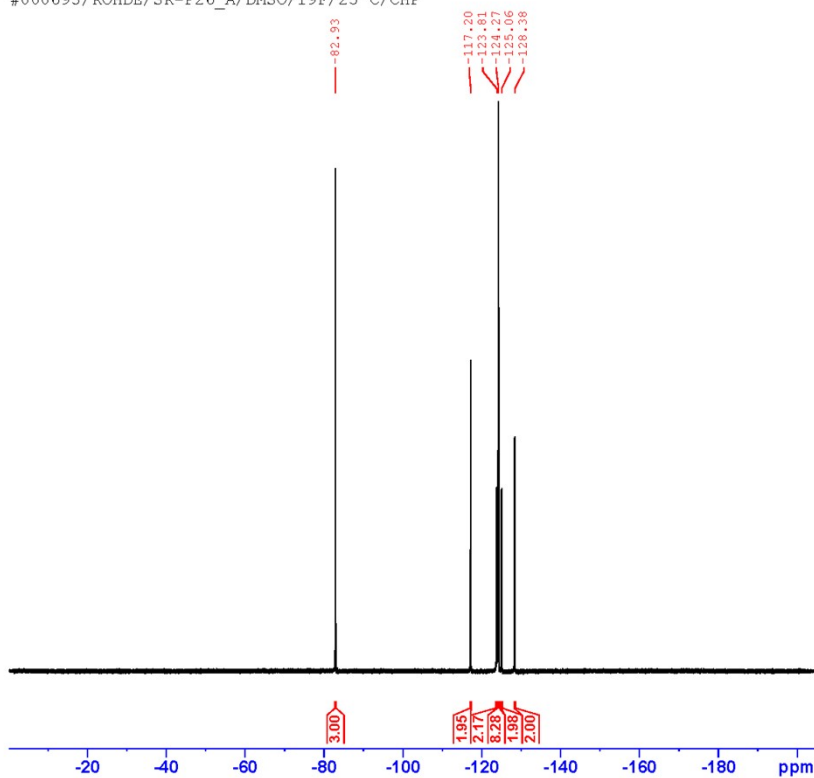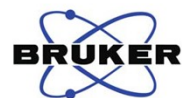

Current Data Parameters  
NAME s5ro000693.SR-P26A  
EXPNO 1  
PROCNO 1

F2 - Acquisition Parameters  
Date\_ 20210330  
Time\_ 16.47 h  
INSTRUM CAB AV4 500 MHz BASIC  
PROBHD Z128651\_0010 ( )  
PULPROG zg30  
TD 262144  
SOLVENT DMSO  
NS 16  
DS 0  
SWH 96153.844 Hz  
FIDRES 0.733596 Hz  
AQ 1.3631488 sec  
RG 101  
DM 5.200 usec  
DE 6.50 usec  
TE 298.2 K  
D1 4.00000000 sec  
TD0 1  
SF01 470.7428956 MHz  
NUC1 19F  
P0 7.33 usec  
F1 22.00 usec  
PLW1 39.50000000 W

F2 - Processing parameters  
SI 131072  
SF 470.7910701 MHz  
WDW EM  
SSB 0  
LB 0.30 Hz  
GB 0  
PC 1.00

Silver carboxylate G<sub>8</sub> F<sub>19</sub>C<sub>9</sub>-CO<sub>2</sub>Ag

Figure S25. G<sub>8</sub>, δ<sub>F</sub> (471 MHz, DMSO-d<sub>6</sub>).

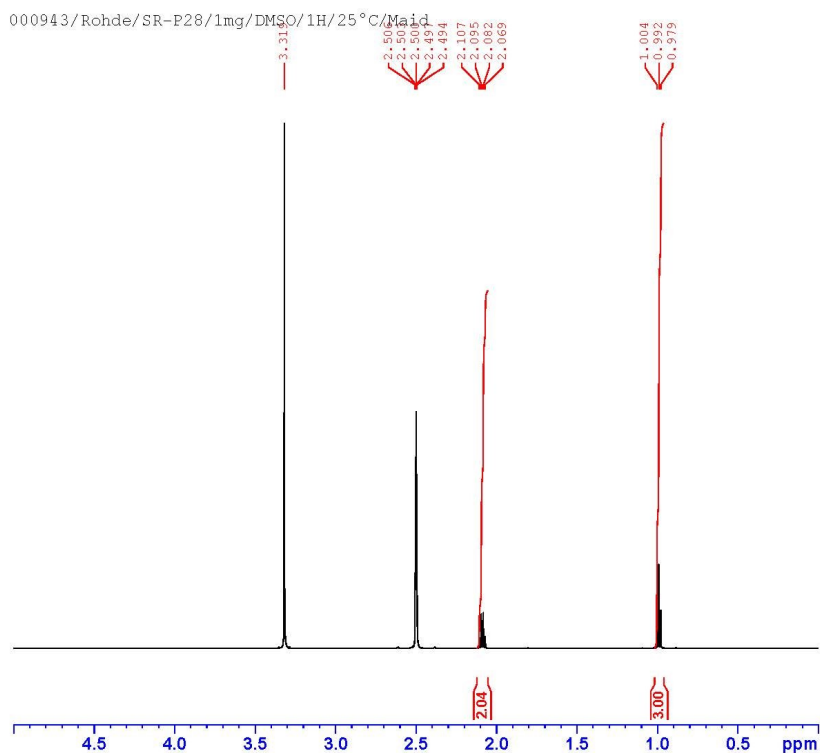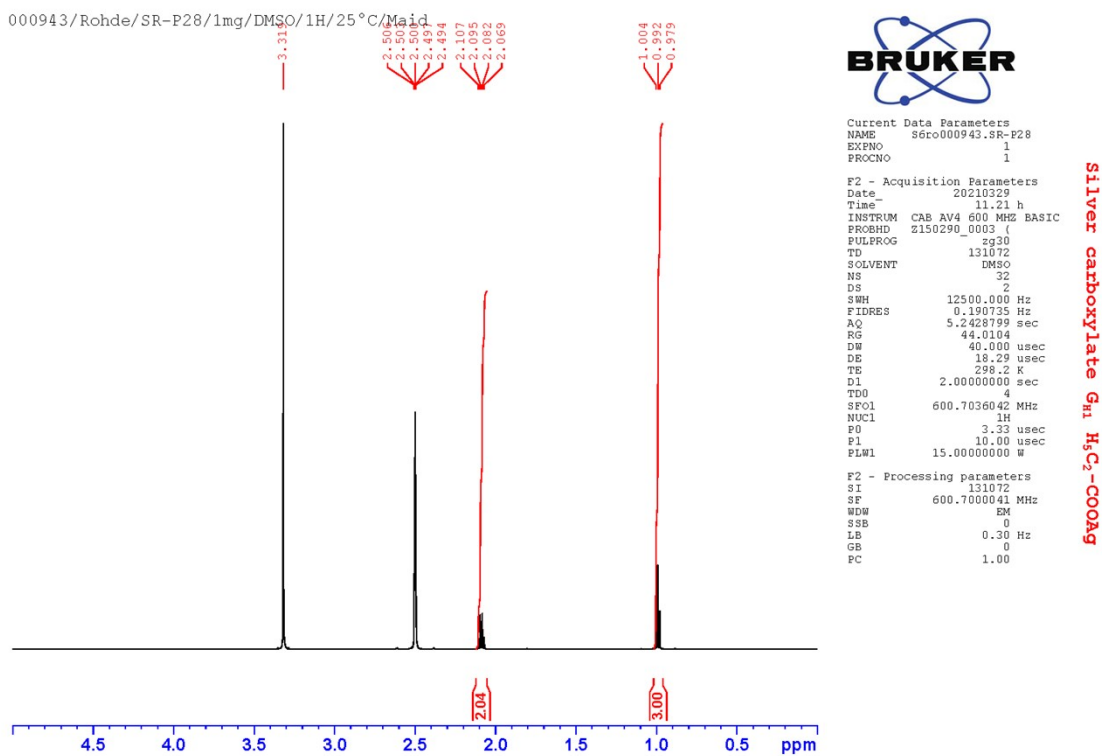

Figure S26. G<sub>H1</sub>, δ<sub>H</sub> (600 MHz, DMSO-d<sub>6</sub>)

Figure S27. G<sub>H1</sub>, δ<sub>C</sub> (151 MHz, DMSO-d<sub>6</sub>).

000943/Rohde/SR-P28/1mg/DMSO/13C{1H}/25°C/Maid

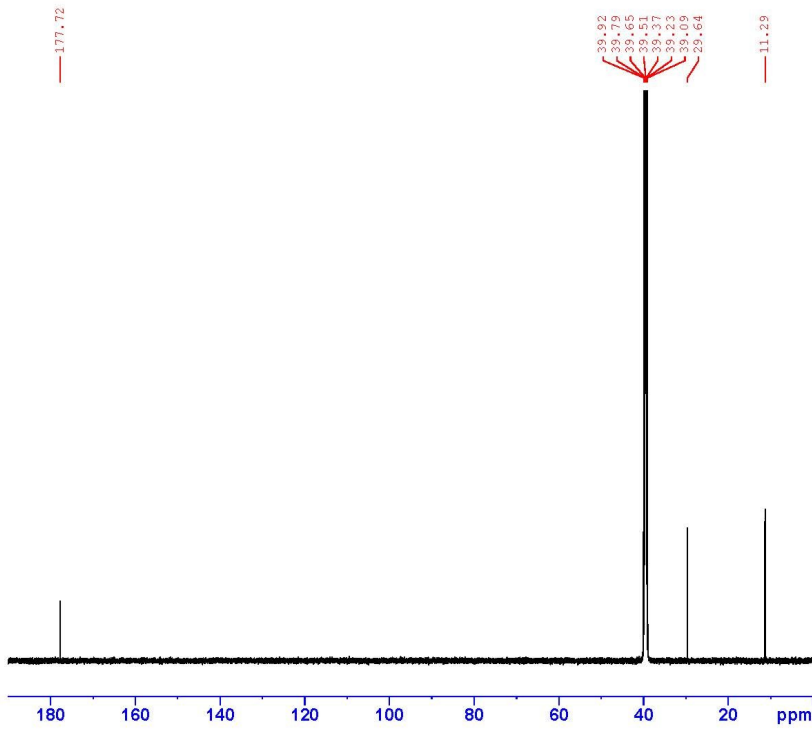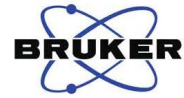

Current Data Parameters  
NAME Sgro000943.SR-P28  
EXPNO 2  
PROCNO 1

F2 - Acquisition Parameters  
Date\_ 20110329  
Time\_ 11.49 h  
INSTRUM CAB AV4 600 Mhz BASIC  
PROBHD z150290\_0003 (4  
PULPROG zgpg30  
TD 65536  
SOLVENT DMSO  
NS 368  
DS 4  
SWH 35714.285 Hz  
FIDRES 1.089913 Hz  
AQ 0.9175040 sec  
RG 13.0208  
DW 14.000 usec  
DE 25.00 usec  
TE 298.2 K  
D1 2.00000000 sec  
D11 0.03000000 sec  
TDO 128  
SFO1 151.0612398 MHz  
NUC1 13C  
P0 3.53 usec  
P1 10.60 usec  
PLW1 19.89299965 W  
SFO2 600.7024028 MHz  
NUC2 1H  
CPCPRG[2] waltz16  
PCPD2 70.00 usec  
PLW2 15.00000000 W  
PLW12 0.30612001 W  
PLW13 0.15398000 W

F2 - Processing parameters  
SI 131072  
SF 151.0462093 MHz  
WDW EM  
SSB 0  
LB 1.00 Hz  
GB 0  
PC 1.40

Silver carboxylate G<sub>1</sub> H<sub>5</sub>C<sub>2</sub>-COOAg

Figure S28.  $G_{H_2}$ ,  $\delta_H$  (600 MHz, DMSO- $d_6$ ).

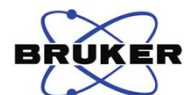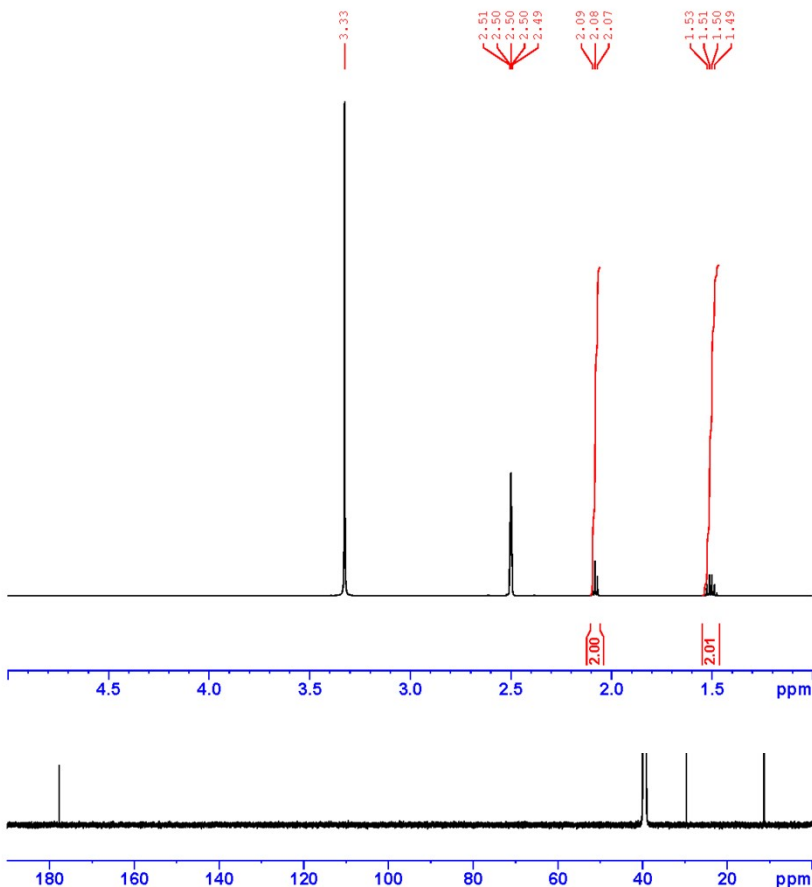Silver carboxylate G<sub>2</sub> H<sub>2</sub>C-COOAgFigure S29. G<sub>H2</sub>, δ<sub>C</sub> (151 MHz, DMSO-d<sub>6</sub>).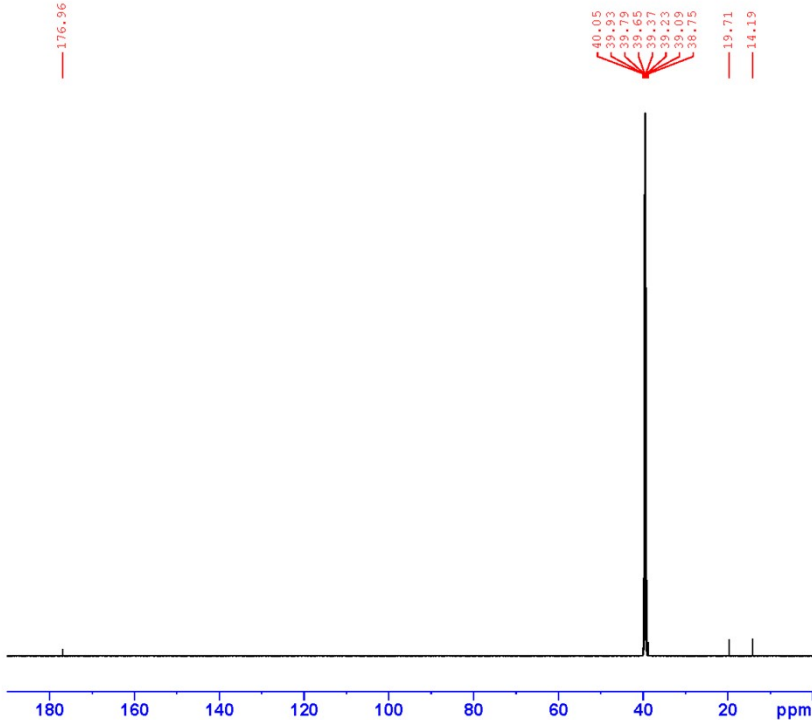Silver carboxylate G<sub>2</sub> H<sub>2</sub>C-COOAgFigure S30. G<sub>H3</sub>, δ<sub>H</sub> (600 MHz, DMSO-d<sub>6</sub>).

000916/Rohde/SR-P29/1mg/DMSO/13C{1H}/25°C/Maid

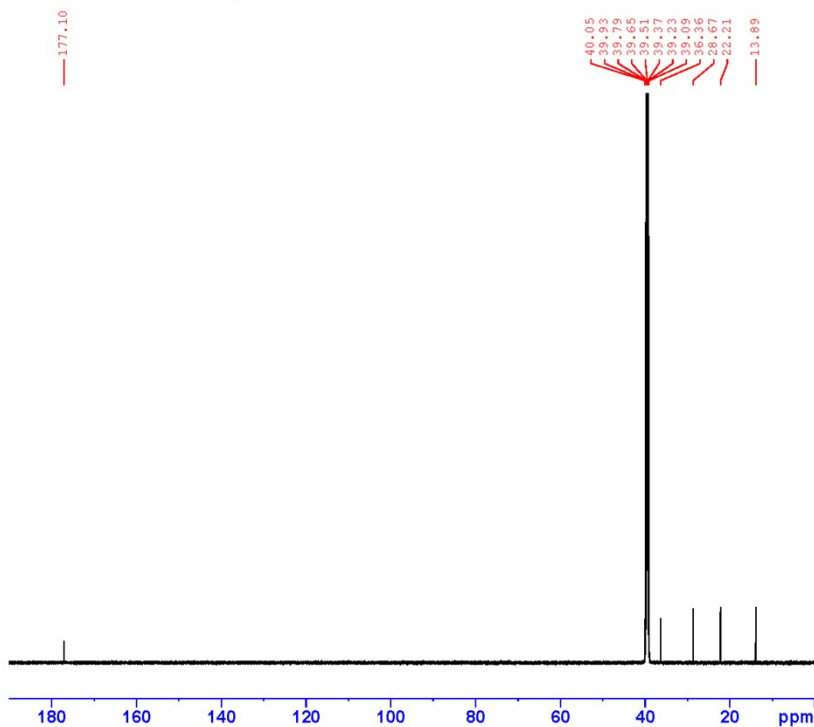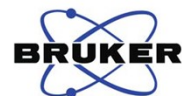

Current Data Parameters  
NAME S6ro000916.SR-P29  
EXPNO 2  
PROCNO 1

F2 - Acquisition Parameters  
Date\_ 20210302  
Time 14.13 h  
INSTRUM CAB AV4 600 MHz BASIC  
PROBHD z150290\_0003 ( )  
PULPROG zgpg30  
TD 65536  
SOLVENT DMSO  
NS 136  
DS 4  
SWH 35714.285 Hz  
FIDRES 1.089913 Hz  
AQ 0.9175040 sec  
RG 13.0208  
DW 14.000 usec  
DE 25.00 usec  
TE 298.2 K  
D1 2.0000000 sec  
D11 0.0300000 sec  
TD0 128  
SFO1 151.0612398 MHz  
NUC1 13C  
P0 3.53 usec  
P1 10.60 usec  
PLW1 19.89299965 W  
SFO2 600.7024028 MHz  
NUC2 1H  
CPDPRG2 waltz16  
PCPD2 70.00 usec  
PLW2 15.0000000 W  
PLW12 0.30612001 W  
PLW13 0.15398000 W

F2 - Processing parameters  
SI 131072  
SF 151.0462089 MHz  
WDW EM  
SSB 0  
LB 1.00 Hz  
GB 0  
PC 1.40

Silver carboxylate G<sub>13</sub> H<sub>3</sub>C<sub>4</sub>-COOAg

Figure S31. G<sub>H3</sub>, δ<sub>C</sub> (151 MHz, DMSO-d<sub>6</sub>).

000917/Rohde/SR-P30/1mg/DMSO/13C{1H}/25°C/Maid

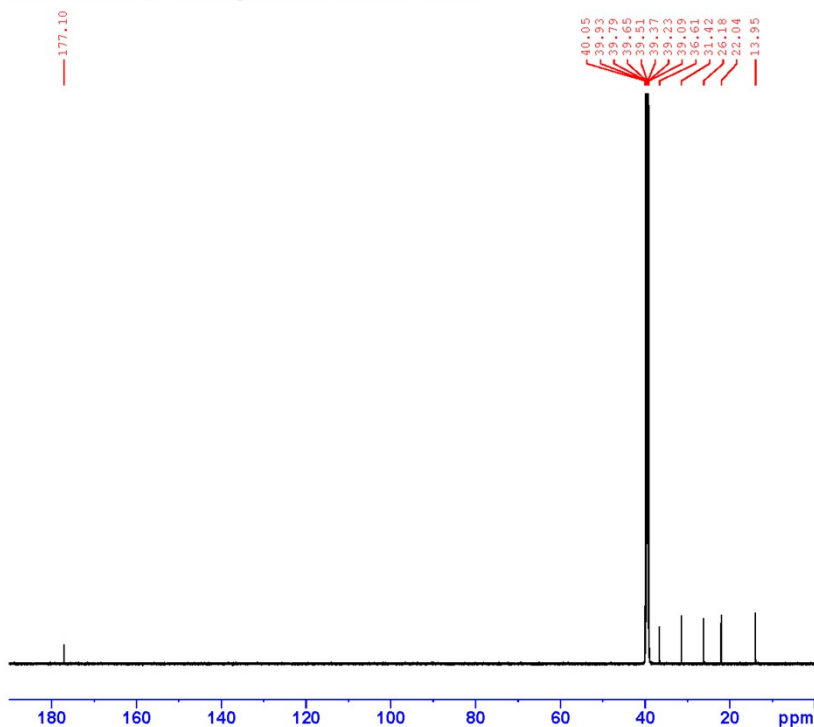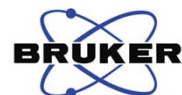

Current Data Parameters  
NAME S6ro000917.SR-P30  
EXPNO 2  
PROCNO 1

F2 - Acquisition Parameters  
Date\_ 20210302  
Time 15.03 h  
INSTRUM CAB AV4 600 MHz BASIC  
PROBHD z150290\_0003 ( )  
PULPROG zgpg30  
TD 65536  
SOLVENT DMSO  
NS 496  
DS 4  
SWH 35714.285 Hz  
FIDRES 1.089913 Hz  
AQ 0.9175040 sec  
RG 13.0208  
DW 14.000 usec  
DE 25.00 usec  
TE 298.1 K  
D1 2.0000000 sec  
D11 0.0300000 sec  
TD0 128  
SFO1 151.0612398 MHz  
NUC1 13C  
P0 3.53 usec  
P1 10.60 usec  
PLW1 19.89299965 W  
SFO2 600.7024028 MHz  
NUC2 1H  
CPDPRG2 waltz16  
PCPD2 70.00 usec  
PLW2 15.0000000 W  
PLW12 0.30612001 W  
PLW13 0.15398000 W

F2 - Processing parameters  
SI 131072  
SF 151.0462092 MHz  
WDW EM  
SSB 0  
LB 1.00 Hz  
GB 0  
PC 1.40

Silver carboxylate G<sub>14</sub> H<sub>1</sub>C<sub>5</sub>-COOAg

Figure S32.  $G_{H4}$ ,  $\delta_H$  (600 MHz, DMSO- $d_6$ ).

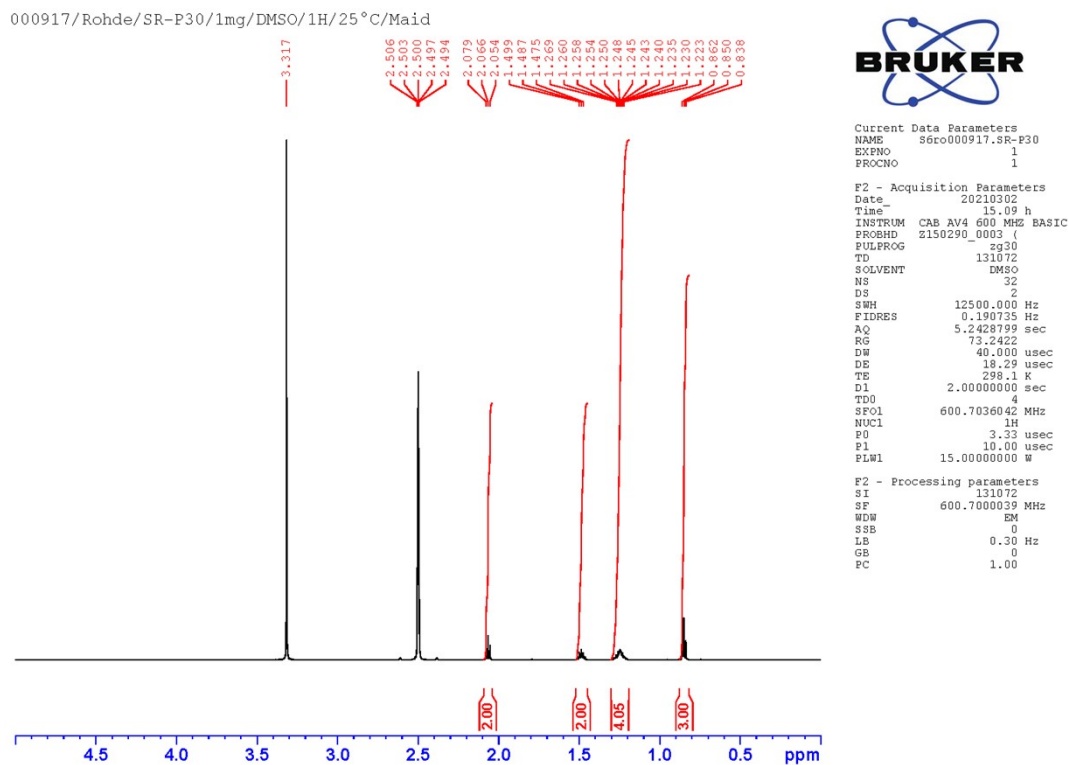

Figure S33.  $G_{H4}$ ,  $\delta_C$  (151 MHz, DMSO- $d_6$ )



000944/Rohde/SR-P31/2mg/DMSO/1H/25°C/Maid

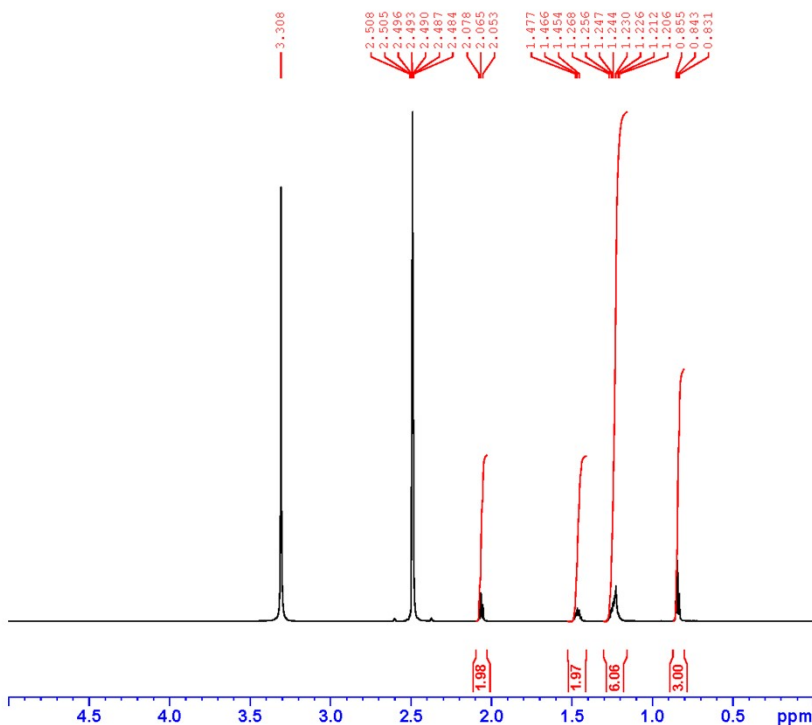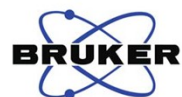

Current Data Parameters  
NAME S6ro000944.SR-P31  
EXFNO 1  
PROCNO 1

F2 - Acquisition Parameters  
Date\_ 20210329  
Time 11.59 h  
INSTRUM CAB AV4 600 MHz BASIC  
PROBHD Z150290\_0003 (Z150290)  
PULPROG zg30  
TD 131072  
SOLVENT DMSO  
NS 32  
DS 2  
SWH 12500.000 Hz  
FIDRES 0.190735 Hz  
AQ 5.2428799 sec  
RG 52.8125  
DW 40.000 usec  
DE 18.29 usec  
TE 298.1 K  
D1 2.0000000 sec  
TD0 4  
SF01 600.7036042 MHz  
NUC1 1H  
P0 3.33 usec  
P1 10.00 usec  
PLW1 15.0000000 W

F2 - Processing parameters  
SI 131072  
SF 600.7000100 MHz  
WDW EM  
SSB 0  
LB 0.30 Hz  
GB 0  
PC 1.00

Silver carboxylate G<sub>5</sub> H<sub>13</sub>C<sub>6</sub>-COOAg

Figure S34. G<sub>H5</sub>, δ<sub>H</sub> (600 MHz, DMSO-d<sub>6</sub>).

000944/Rohde/SR-P31/2mg/DMSO/13C{1H}/25°C/Maid

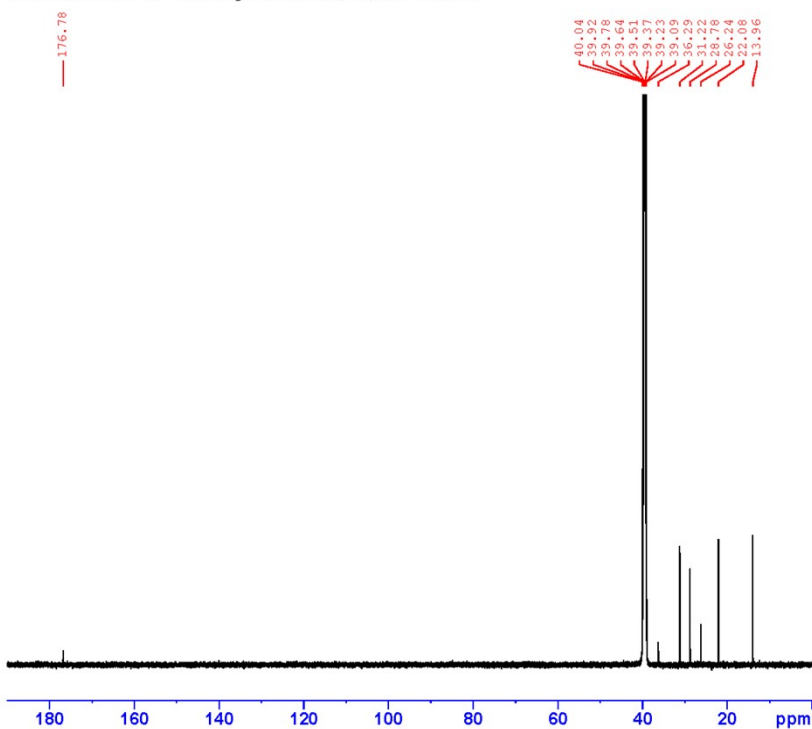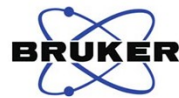

Current Data Parameters  
NAME S6ro000944.SR-P31  
EXFNO 2  
PROCNO 1

F2 - Acquisition Parameters  
Date\_ 20210329  
Time 12.57 h  
INSTRUM CAB AV4 600 MHz BASIC  
PROBHD Z150290\_0003 (Z150290)  
PULPROG zgpg30  
TD 65536  
SOLVENT DMSO  
NS 904  
DS 4  
SWH 35714.285 Hz  
FIDRES 1.089913 Hz  
AQ 0.9175040 sec  
RG 13.0208  
DW 14.000 usec  
DE 25.00 usec  
TE 298.1 K  
D1 2.0000000 sec  
D11 0.0300000 sec  
TD0 128  
SF01 151.0612398 MHz  
NUC1 13C  
P0 3.53 usec  
P1 10.60 usec  
PLW1 19.8929995 W  
SF02 600.7024028 MHz  
NUC2 1H  
CPDPRG2 waltz16  
PCPD 70.00 usec  
PLW2 15.0000000 W  
PLW12 0.30612001 W  
PLW13 0.15398000 W

F2 - Processing parameters  
SI 131072  
SF 151.0462097 MHz  
WDW EM  
SSB 0  
LB 1.00 Hz  
GB 0  
PC 1.40

Silver carboxylate G<sub>5</sub> H<sub>13</sub>C<sub>6</sub>-COOAg

Figure S35. G<sub>H5</sub>, δ<sub>C</sub> (151 MHz, DMSO-d<sub>6</sub>).

000950/Rohde/SR-P32/1mg/DMSO/1H/50°C/Maid

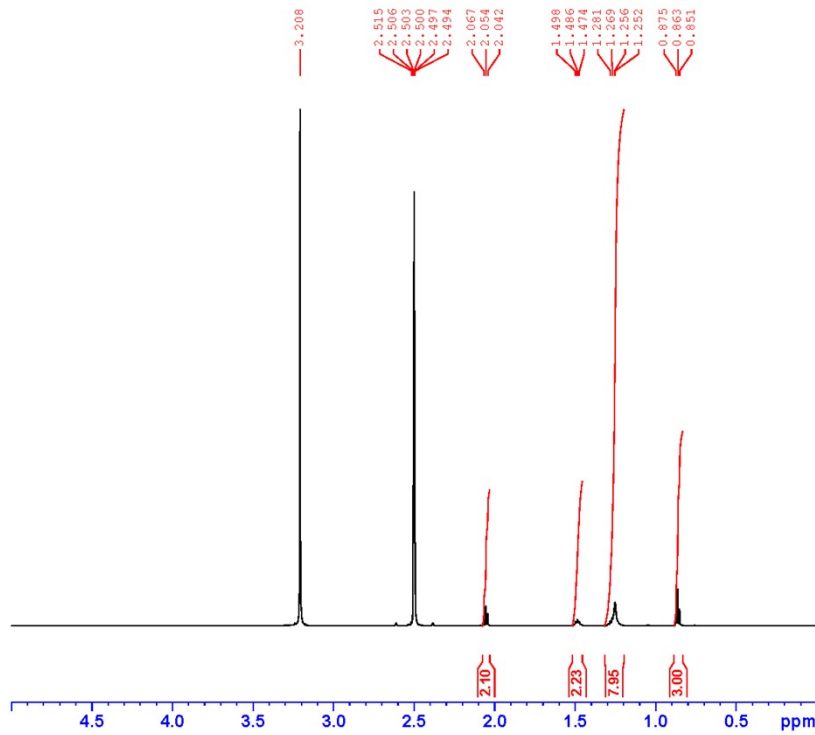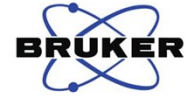

Current Data Parameters  
NAME s6ro000950.SR-P32  
EXPNO 1  
PROCNO 1

F2 - Acquisition Parameters  
Date\_ 20210407  
Time 12.49 h  
INSTRUM CAB AV4 600 MHz BASIC  
PROBHD Z150290\_0003 ( )  
PULPROG zg30  
TD 131072  
SOLVENT DMSO  
NS 32  
DS 2  
SWH 12500.000 Hz  
FIDRES 0.190735 Hz  
AQ 5.2428799 sec  
RG 58.6806  
DW 40.000 usec  
DE 18.29 usec  
TE 323.2 K  
D1 2.00000000 sec  
TD0 4  
SFO1 600.7036042 MHz  
NUC1 1H  
P0 3.33 usec  
P1 10.00 usec  
PLW1 15.00000000 W

F2 - Processing parameters  
SI 131072  
SF 600.7000043 MHz  
WDW EM  
SSB 0  
LB 0.30 Hz  
GB 0  
PC 1.00

Silver carboxylate G6  $H_5C_7-COOAg$

Figure S36.  $G_{H6}$ ,  $\delta_H$  (600 MHz, DMSO- $d_6$ ).

000950/Rohde/SR-P32/1mg/DMSO/1H/50°C/Maid

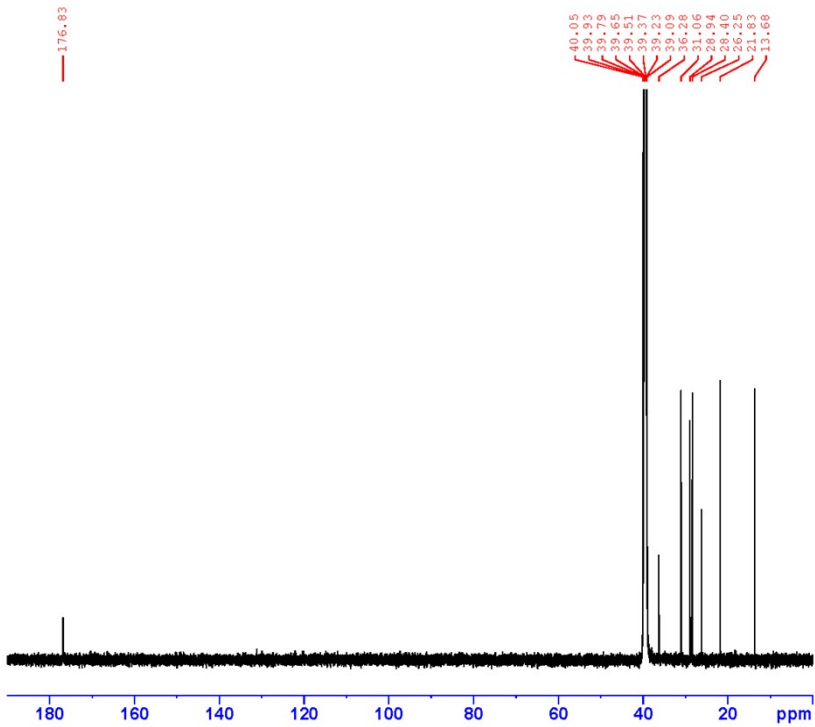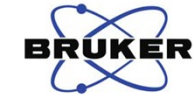

Current Data Parameters  
NAME s6ro000950.SR-P32  
EXPNO 2  
PROCNO 1

F2 - Acquisition Parameters  
Date\_ 20210407  
Time 12.41 h  
INSTRUM CAB AV4 600 MHz BASIC  
PROBHD Z150290\_0003 ( )  
PULPROG zgpg30  
TD 65536  
SOLVENT DMSO  
NS 1496  
DS 4  
SWH 35714.285 Hz  
FIDRES 1.089913 Hz  
AQ 0.9175040 sec  
RG 13.0208  
DW 14.000 usec  
DE 25.00 usec  
TE 323.1 K  
D1 2.00000000 sec  
D11 0.03000000 sec  
TD0 1280  
SFO1 151.0612398 MHz  
NUC1 13C  
P0 3.53 usec  
P1 10.60 usec  
PLW1 19.89259965 W  
SFO2 600.7024028 MHz  
NUC2 1H  
CPDPRG2 waltz16  
PCPD2 70.00 usec  
PLW2 15.00000000 W  
PLW12 0.30612001 W  
PLW13 0.15398000 W

F2 - Processing parameters  
SI 131072  
SF 151.0462371 MHz  
WDW EM  
SSB 0  
LB 1.00 Hz  
GB 0  
PC 1.40

Silver carboxylate G6  $H_5C_7-COOAg$

Figure S37.  $G_6$ ,  $\delta_C$  (151 MHz, DMSO- $d_6$ ).

Reference:

- [1] E. Szlyk, R. Szczęsny, A. Wojtczak, *Dalton Trans.*, 2010, **39**, 1823-1830.
- [2] E. Szlyk, I. Szymańska, A. Surdykowski, T. Głowiak, A. Wojtczak, A. Goliński, *Dalton Trans.*, 2003, 3404-3410
- [3] E. Szlyk, I. Łakomska, A. Grodzicki, *Thermochim. Acta*, **1993**, 223, 207–212.
- [4] J. Torroba, J. Aynsley, P. A. Tuzimoto, D. W. Bruce, *RSC Adv.*, 2012, **2**, 12866-12869
- [5] E. Szlyk, Szymańska I, R. Szczęsny, *Polish J Chem.*, 2005, **79**, 627-35.
